# Supplementary material for: Loss-of-function of an α-SNAP gene confers resistance to soybean cyst nematode
Source: PubMed Central journal article supplement (PMC10665432; doi:10.1038/s41467-023-43295-y), 2023-11-22
Supplement: 41467_2023_43295_MOESM1_ESM.pdf [file 41467_2023_43295_MOESM1_ESM.pdf]

**QTL MAPPING  
SUPPLEMENTARY DATA**

**Supplementary Figure 1.** Descriptive statistics of responses to SCN TN22 population of HG type 1.2.5.7 of three populations: PI 90763 x Peking, Forrest x PI 437654, and SA10-8471 x PI 90763. The parental lines were added to evaluate resistance differences. The normality tests of female index (%) are shown by Shapiro-Wilk ( $w$ ), skewness, and kurtosis.

| Female Index [%] |           |                      |     |      |      | Shapiro-Wilk ( $w$ ) | Skewness | Kurtosis |
|------------------|-----------|----------------------|-----|------|------|----------------------|----------|----------|
| Parents          |           | 144 F <sub>3:4</sub> |     |      |      |                      |          |          |
| PI 90763         | Peking    | Mean                 | Min | Max  | SD   |                      |          |          |
| 0                | 19.8      | 7.3                  | 0   | 24.1 | 6.2  | 0.92                 | 0.54     | 2.4      |
| Female Index [%] |           |                      |     |      |      | Shapiro-Wilk ( $w$ ) | Skewness | Kurtosis |
| Parents          |           | 131 F <sub>3:4</sub> |     |      |      |                      |          |          |
| Forrest          | PI 437654 | Mean                 | Min | Max  | SD   |                      |          |          |
| 86               | 0.6       | 45.7                 | 0   | 107  | 35.3 | 0.62                 | 0.02     | -1.7     |
| Female Index [%] |           |                      |     |      |      | Shapiro-Wilk ( $w$ ) | Skewness | Kurtosis |
| Parents          |           | 244 F <sub>3:4</sub> |     |      |      |                      |          |          |
| SA10-8471        | PI 90763  | Mean                 | Min | Max  | SD   |                      |          |          |
| 88               | 0         | 74.3                 | 0   | 114  | 28.1 | 0.83                 | -1.4     | 1.0      |

**Supplementary Figure 2.** (a) Genetic linkage maps created for 144 F<sub>3:4</sub> lines from population PI 90763 x Peking. The X-axis represents chromosome numbers, and Y-axis represents genetic position of single nucleotide polymorphism (SNP) markers. Distribution of SNPs are represented by black bars across each chromosome.

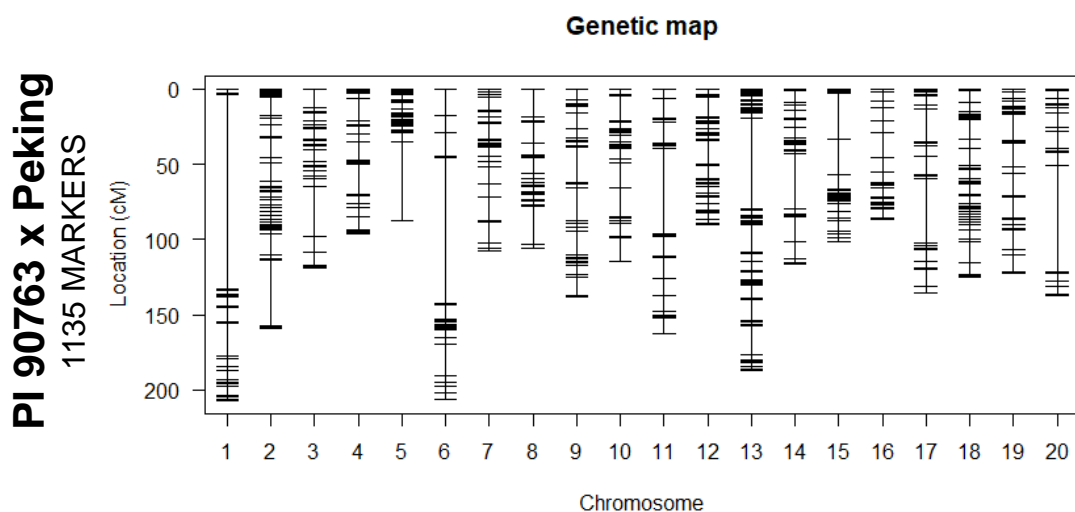

| Chr #   | Markers assigned to parents | Markers removed for distortion, uninformative | Markers removed for gap closure | Final number of markers | Final Length (cM) | Average spacing (cM) | Max spacing (cM) |
|---------|-----------------------------|-----------------------------------------------|---------------------------------|-------------------------|-------------------|----------------------|------------------|
| 1       | 56                          | 205                                           | 1                               | 55                      | 213.7             | 0.3                  | 128.4            |
| 2       | 83                          | 239                                           | -                               | 83                      | 158.9             | 0.3                  | 43.9             |
| 3       | 56                          | 219                                           | -                               | 56                      | 119.0             | 0.3                  | 32.8             |
| 4       | 44                          | 228                                           | -                               | 44                      | 96.4              | 0.6                  | 19.7             |
| 5       | 41                          | 252                                           | 1                               | 40                      | 87.2              | 0.6                  | 52.3             |
| 6       | 64                          | 250                                           | -                               | 64                      | 206.5             | 0.0                  | 97.0             |
| 7       | 50                          | 269                                           | -                               | 50                      | 107.8             | 0.3                  | 15.8             |
| 8       | 49                          | 333                                           | 1                               | 48                      | 144.8             | 0.3                  | 24.8             |
| 9       | 58                          | 207                                           | -                               | 58                      | 138.5             | 0.6                  | 23.5             |
| 10      | 40                          | 277                                           | -                               | 40                      | 114.9             | 0.6                  | 19.5             |
| 11      | 37                          | 235                                           | 1                               | 36                      | 187.7             | 0.5                  | 56.9             |
| 12      | 50                          | 209                                           | 1                               | 49                      | 90.3              | 0.8                  | 15.5             |
| 13      | 115                         | 271                                           | -                               | 115                     | 186.7             | 0.3                  | 60.3             |
| 14      | 37                          | 236                                           | -                               | 37                      | 116.0             | 0.6                  | 36.7             |
| 15      | 83                          | 220                                           | -                               | 83                      | 101.3             | 0.0                  | 29.9             |
| 16      | 32                          | 207                                           | -                               | 32                      | 86.3              | 0.8                  | 16.5             |
| 17      | 40                          | 221                                           | -                               | 40                      | 135.4             | 0.6                  | 42.8             |
| 18      | 80                          | 298                                           | -                               | 80                      | 125.1             | 0.3                  | 13.3             |
| 19      | 90                          | 237                                           | -                               | 90                      | 122.5             | 0.0                  | 17.2             |
| 20      | 35                          | 237                                           | -                               | 35                      | 137.5             | 0.4                  | 70.5             |
| Overall | 1140                        | 4850                                          | 5                               | 1135                    | 2676.3            | 0.4                  | 128.4            |

**Supplementary Figure 2.** (b) Genetic linkage maps created for 131  $F_{3:4}$  lines from population Forrest x PI 437654. The X-axis represents chromosome numbers, and Y-axis represents genetic position of single nucleotide polymorphism (SNP) markers. Distribution of SNPs are represented by black bars across each chromosome.

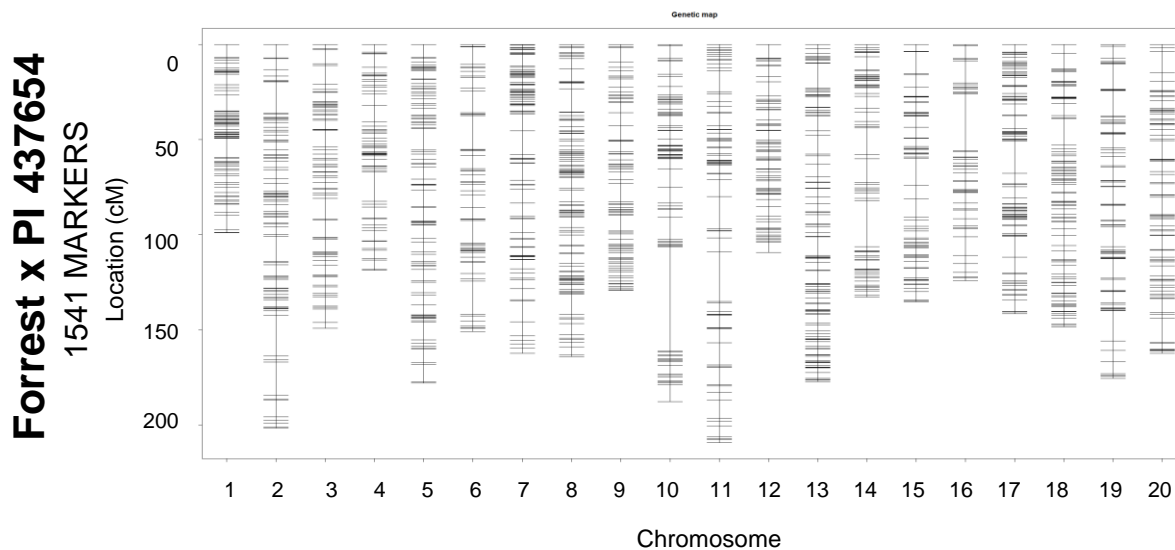

| Chr #   | Markers assigned to parents | Markers removed for distortion, uninformative | Markers removed for gap closure | Final number of markers | Final Length (cM) | Average spacing (cM) | Max spacing (cM) |
|---------|-----------------------------|-----------------------------------------------|---------------------------------|-------------------------|-------------------|----------------------|------------------|
| 1       | 134                         | 61                                            | -                               | 73                      | 99.1              | 1.4                  | 9.9              |
| 2       | 144                         | 52                                            | 2                               | 90                      | 201.7             | 2.3                  | 21.4             |
| 3       | 135                         | 60                                            | -                               | 75                      | 149.1             | 2.0                  | 11.0             |
| 4       | 134                         | 76                                            | 1                               | 57                      | 118.7             | 2.1                  | 15.4             |
| 5       | 149                         | 61                                            | -                               | 88                      | 177.9             | 2.0                  | 11.3             |
| 6       | 124                         | 64                                            | 1                               | 59                      | 150.8             | 2.6                  | 17.7             |
| 7       | 172                         | 82                                            | -                               | 90                      | 162.4             | 1.8                  | 12.3             |
| 8       | 183                         | 80                                            | -                               | 103                     | 164.1             | 1.6                  | 12.3             |
| 9       | 110                         | 36                                            | -                               | 74                      | 129.3             | 1.8                  | 9.6              |
| 10      | 162                         | 85                                            | 2                               | 75                      | 187.8             | 2.5                  | 54.8             |
| 11      | 120                         | 42                                            | 3                               | 75                      | 209.3             | 2.8                  | 26.2             |
| 12      | 115                         | 47                                            | -                               | 68                      | 109.2             | 1.6                  | 7.4              |
| 13      | 182                         | 78                                            | -                               | 104                     | 177.2             | 1.7                  | 13.1             |
| 14      | 103                         | 36                                            | -                               | 67                      | 132.8             | 2.0                  | 24.4             |
| 15      | 130                         | 62                                            | -                               | 68                      | 135.3             | 2.0                  | 14.2             |
| 16      | 106                         | 60                                            | -                               | 46                      | 124.1             | 2.8                  | 29.5             |
| 17      | 154                         | 66                                            | -                               | 88                      | 141.6             | 1.6                  | 16.8             |
| 18      | 167                         | 80                                            | -                               | 87                      | 148.4             | 1.7                  | 14.0             |
| 19      | 169                         | 94                                            | -                               | 75                      | 175.5             | 2.4                  | 16.2             |
| 20      | 121                         | 42                                            | -                               | 79                      | 162.4             | 2.1                  | 12.6             |
| Overall | 2814                        | 1264                                          | 9                               | 1541                    | 3056.8            | 2.0                  | 54.8             |

**Supplementary Figure 2.** (c) Genetic linkage maps created for 244  $F_{3,4}$  lines from population SA10-8471 x PI 90763. The X-axis represents chromosome numbers, and Y-axis represents genetic position of single nucleotide polymorphism (SNP) markers. Distribution of SNPs are represented by black bars across each chromosome.

**SA10-8471 x PI 90763  
2188 MARKERS**

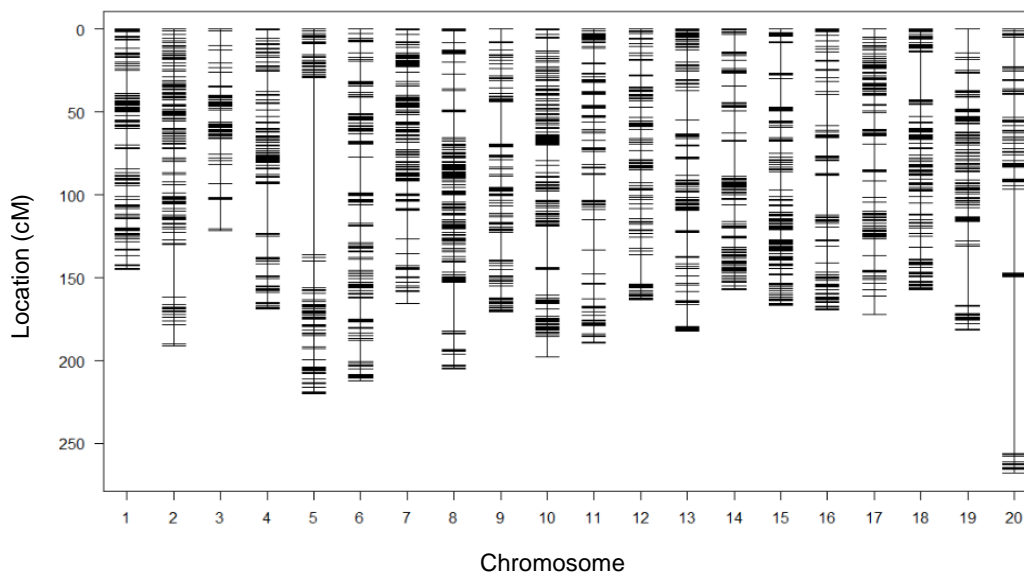

| Chr #   | Markers assigned to parents | Markers removed for distortion, uninformative | Markers removed for gap closure | Final number of markers | Final Length (cM) | Average spacing (cM) | Max spacing (cM) |
|---------|-----------------------------|-----------------------------------------------|---------------------------------|-------------------------|-------------------|----------------------|------------------|
| 1       | 105                         | 156                                           | 1                               | 104                     | 150.0             | 1.4                  | 14.2             |
| 2       | 131                         | 191                                           | 1                               | 130                     | 196.0             | 1.5                  | 31.6             |
| 3       | 72                          | 203                                           | -                               | 65                      | 200.2             | 1.9                  | 17.7             |
| 4       | 111                         | 161                                           | -                               | 111                     | 168.6             | 1.5                  | 30.1             |
| 5       | 92                          | 201                                           | 3                               | 89                      | 225.3             | 2.5                  | 106.7            |
| 6       | 124                         | 190                                           | -                               | 124                     | 212.1             | 1.7                  | 21.7             |
| 7       | 130                         | 189                                           | -                               | 130                     | 165.4             | 1.3                  | 17.1             |
| 8       | 144                         | 238                                           | -                               | 144                     | 205.0             | 1.4                  | 29.6             |
| 9       | 96                          | 169                                           | -                               | 96                      | 170.5             | 1.8                  | 25.6             |
| 10      | 148                         | 169                                           | -                               | 148                     | 197.9             | 1.3                  | 24.8             |
| 11      | 96                          | 173                                           | -                               | 91                      | 189.6             | 2.1                  | 18.5             |
| 12      | 100                         | 159                                           | -                               | 100                     | 168.2             | 1.6                  | 18.2             |
| 13      | 102                         | 284                                           | 2                               | 100                     | 202.4             | 1.8                  | 17.9             |
| 14      | 100                         | 173                                           | -                               | 100                     | 162.2             | 1.6                  | 20.8             |
| 15      | 126                         | 177                                           | -                               | 126                     | 166.8             | 1.3                  | 18.2             |
| 16      | 94                          | 145                                           | -                               | 94                      | 169.3             | 1.8                  | 24.2             |
| 17      | 113                         | 148                                           | -                               | 113                     | 172.2             | 1.5                  | 15.3             |
| 18      | 128                         | 250                                           | -                               | 128                     | 162.2             | 1.2                  | 28.9             |
| 19      | 114                         | 213                                           | -                               | 114                     | 181.7             | 1.6                  | 35.9             |
| 20      | 81                          | 191                                           | -                               | 81                      | 268.0             | 3.3                  | 106.9            |
| Overall | 2207                        | 3780                                          | 7                               | 2188                    | 3733.3            | 1.7                  | 106.9            |

**Supplementary Figure 3.** Quantitative trait loci (QTL) for resistance to SCN TN22 population of HG type 1.2.5.7 mapped in 144 F<sub>3:4</sub> lines of PI 90763 x Peking, 131 F<sub>3:4</sub> lines of Forrest x PI 437654, and 244 F<sub>3:4</sub> lines of SA10-8471 x PI 90763. The analysis was done using MapQTL version 6 software.

| Population           | Peak Marker <sup>a</sup> | Confidence Interval Markers <sup>b</sup> | Confidence Interval | LOD  | PV <sup>c</sup> | Add  |
|----------------------|--------------------------|------------------------------------------|---------------------|------|-----------------|------|
| PI 90763 x Peking    | Gm02_46462690            | Gm02_42012522 – Gm02_46907259            | 4.9 Mb              | 8.9  | 22.9            | -5.4 |
|                      | Gm12_9059057             | Gm12_7791511 – Gm12_9149774              | 1.4 Mb              | 4.1  | 9.6             | -2.3 |
| Forrest x PI 437654  | Gm02_45106877            | Gm02_43556059 – Gm02_45106877            | 1.6 Mb              | 4.4  | 3.1             | 8.6  |
|                      | Gm11_32959788            | Gm11_32276359 – Gm11_33309696            | 1.1 Mb              | 29.1 | 35.9            | 28.6 |
| SA10-8471 x PI 90763 | Gm11_32959788            | Gm11_32586847 – SNAP11-1                 | 381 Kb              | 22.3 | 26.9            | 17.2 |
|                      | Gm18_1562536             | Gm18_1427672 – SNAP18-1                  | 217 Kb              | 15.9 | 18.2            | 14.1 |

<sup>a</sup> Peak and confidence interval physical position based on Wm82.a2.v1 are represented by marker names.

<sup>b</sup> SNAP11-1 (Gm11\_32968127) and SNAP18-1 (Gm18\_1645012) based on Wm82.a2.v1.

<sup>c</sup> Percentage of phenotypic variation represented by individual QTL.

**Supplementary Figure 4.** Quantitative trait loci (QTL) for resistance to SCN TN22 population of HG type 1.2.5.7 mapped in 144 F<sub>3:4</sub> lines of PI 90763 x Peking, 131 F<sub>3:4</sub> lines of Forrest x PI 437654, and 244 F<sub>3:4</sub> lines of SA10-8471 x PI 90763. Analysis was done using RQTL: (a) Composite Interval Mapping (CIM). Genome wide significance threshold (LOD) indicated by horizontal bars. (b) Output of fitqtl ANOVA using QTL detected by CIM.

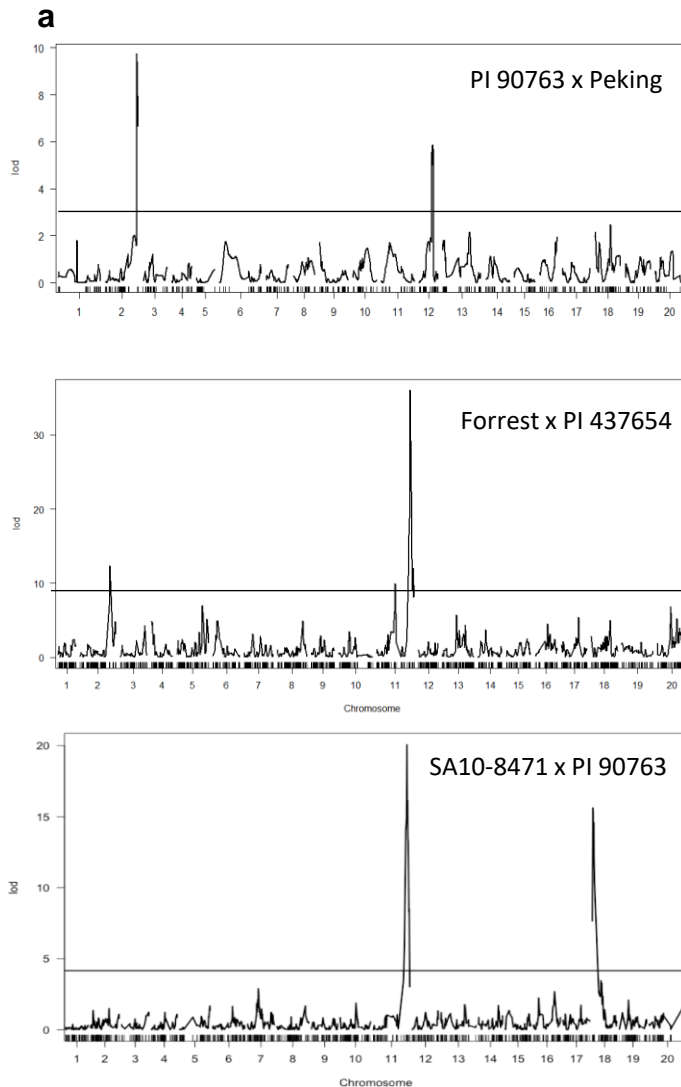

**b**

| Population           | Chr. | Peak Marker (W82.a2) | QTL Peak (cM) | 1.5 LOD Drop (cM) | LOD Score | LOD Threshold |
|----------------------|------|----------------------|---------------|-------------------|-----------|---------------|
| PI 90763 x Peking    | 2    | Gm02_46462690        | 153           | 113.3 - 158.4     | 9.8       | 3             |
|                      | 12   | Gm12_11867391        | 66            | 59.5 - 70.8       | 5.9       | 3             |
| Forrest x PI 437654  | 2    | Gm02_45106877        | 185           | 165.72-184.58     | 12.3      | 9.3           |
|                      | 11   | Gm11_32959788        | 187           | 182.8-196.7       | 36        | 9.3           |
| SA10-8471 x PI 90763 | 11   | Gm11_32889668        | 319           | 316.9 – 322.3     | 76.6      | 4.3           |
|                      | 18   | SNAP18-1             | 18            | 14.4 – 18.8       | 71.3      | 4.3           |

**Supplementary Figure 5.** Estimated allelic effects of all detected QTL in three populations through modeling using R/QTL: (a) Output of fitqtl ANOVA function using QTL detected by Composite Interval Mapping; (b) Plot of the estimated allelic effects  $\pm 1$  SE evaluating the combination of two QTL detected by Composite Interval Mapping.

**a**

| Population           | QTL           | df | Type III SS | LOD    | % Var  | F value | P value (Chi <sup>2</sup> ) | P value (F) | Significance |
|----------------------|---------------|----|-------------|--------|--------|---------|-----------------------------|-------------|--------------|
| PI 90763 x Peking    | QTL02         | 6  | 1,289       | 9.4    | 23.6   | 7.9     | 0                           | 2.82E-07    | ***          |
|                      | QTL12         | 6  | 882         | 6.7    | 16.1   | 5.4     | 0                           | 5.21E-05    | ***          |
|                      | QTL02 x QTL12 | 4  | 259         | 2.1    | 4.7    | 2.4     | 0.044                       | 0.0553      |              |
| Forrest x PI 437654  | QTL02         | 6  | 12588       | 11.556 | 7.727  | 10.191  | 0                           | 4.01E-09    | ***          |
|                      | QTL11         | 6  | 125846      | 51.018 | 77.248 | 101.879 | 0                           | < 2e-16     | ***          |
|                      | QTL02 x QTL11 | 4  | 4391        | 4.584  | 2.696  | 5.333   | 0                           | 0.000543    | ***          |
| SA10-8471 x PI 90763 | QTL11         | 6  | 112,455     | 76.6   | 57.9   | 128.1   | 0                           | < 2E-16     | ***          |
|                      | QTL18         | 6  | 98,445      | 71.3   | 50.7   | 112.1   | 0                           | < 2E-16     | ***          |
|                      | QTL11 x QTL18 | 4  | 60,160      | 53.4   | 30.9   | 102.8   | 0                           | < 2E-16     | ***          |

**b**

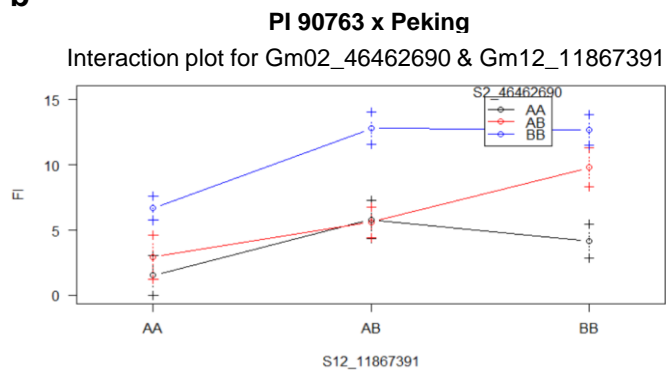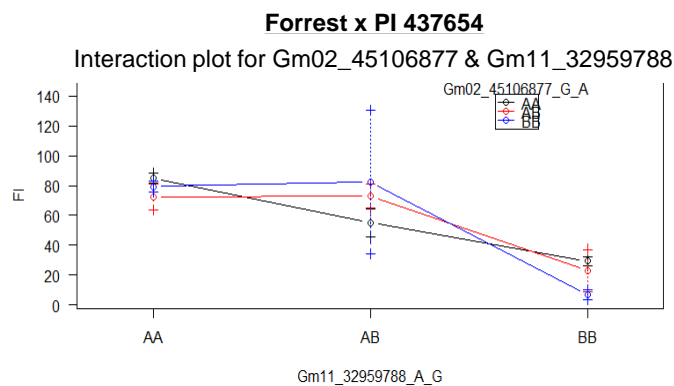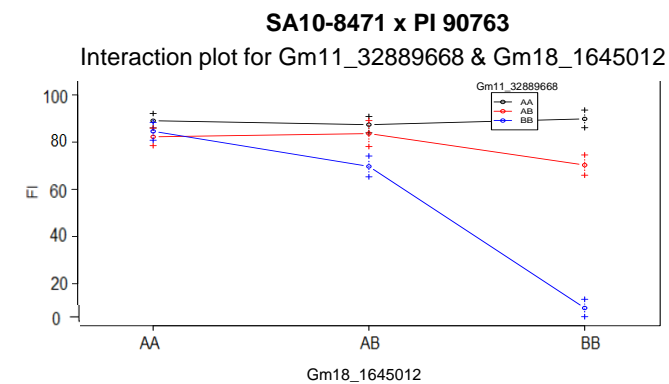



**FINE-MAPPING QTL02  
SUPPLEMENTARY DATA**

**Supplementary Figure 6.** Initial narrowing-down the region of QTL02 using F<sub>3:4</sub> recombinant lines derived from populations (a) PI 90763 x Peking; (b) SA10-8471 x PI 90763; and populations reported by Basnet et al. 2022: (c) SA13-1385 x PI 90763, and (d) LD11-2170 x PI 90763. All lines carry homozygous *rhg1-a*, *rhg2*, and *Rhg4*. All lines were inoculated with the same population TN22 of HG type 1.2.5.7. PI 90763 sequence marked in dark gray, the other parent sequence marked in white, and heterozygotes are marked in purple. Red vertical bars indicate recombination spots.

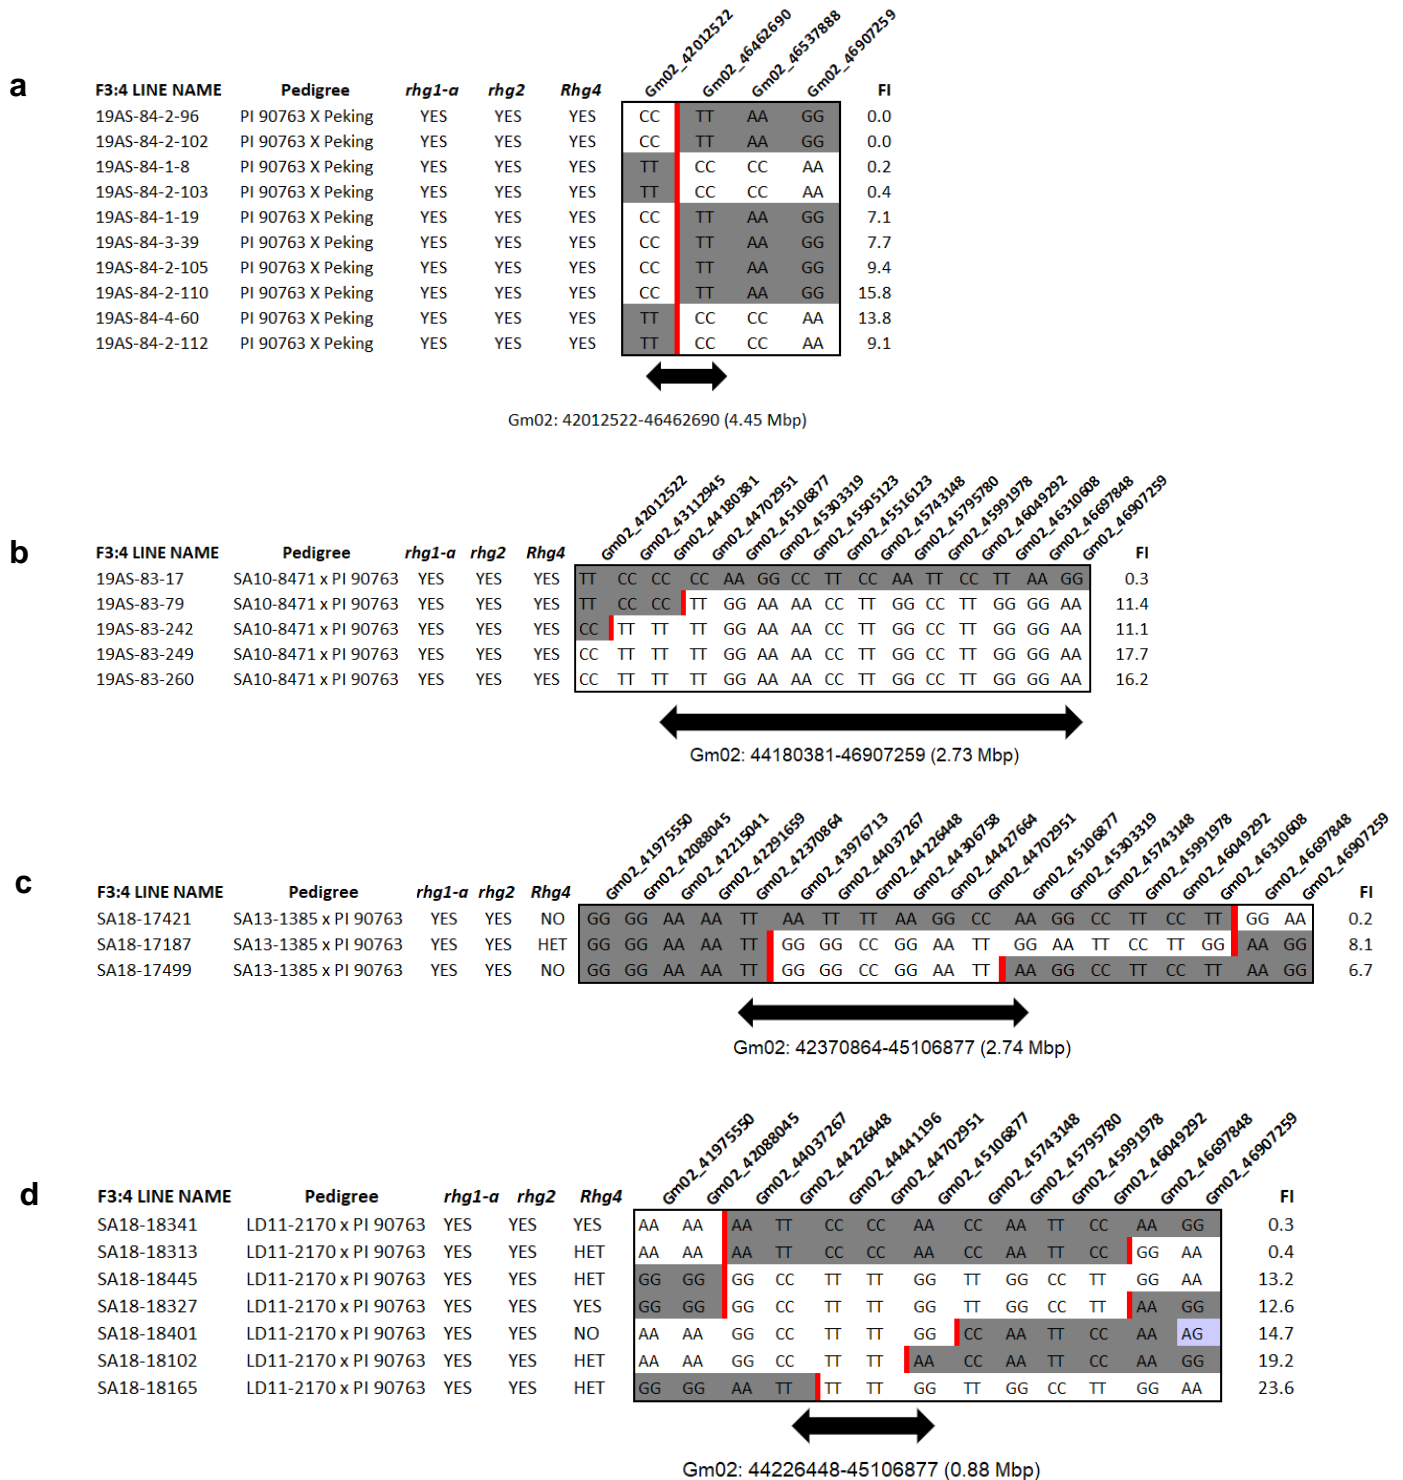

**Supplementary Figure 7.** Competitive Allele Specific PCR (KASP) assays developed for fine-mapping of QTL02. The QTL02 has been fine-mapped between markers Gm02-09 and Gm02-14.

| ASSAY      | Wm82 | PEKING | PI 90763 | POSITION (Wm82.a2) | Primer-Forward_AlleleX              | Primer-Forward_AlleleY                | Primer-Reverse_Common          |
|------------|------|--------|----------|--------------------|-------------------------------------|---------------------------------------|--------------------------------|
| MU-Gm02-01 | T    | A      | T        | Gm02:44231725      | ACAACCTGCCACAGCTTTGAAAGCA           | ACAACCTGCCACAGCTTTGAAAGCT             | CAGCAAACACCTTTTTTCTTTCAATGTGAT |
| MU-Gm02-02 | G    | T      | G        | Gm02:44271063      | AAATCCAACCACTAGAACCCACACA           | TCCAACCACTAGAACCCACACC                | TGGACAACAATGTATTTGGTGAATGCATTT |
| MU-Gm02-03 | T    | C      | T        | Gm02:44492572      | CCGACAAGATTTGGCAATGTCAG             | GCCGACAAGATTTGGCAATGTCAA              | CCCCTATATTTGCATTCACGAGCCAA     |
| MU-Gm02-04 | C    | T      | C        | Gm02:44553129      | GAGCCCGTGAAGAAATTTGTTGGTGATA        | AGCCCGTGAAGAAATTTGTTGGTGATG           | TGTAATCCATTTCTTCTACACCATCAGCA  |
| MU-Gm02-05 | A    | G      | A        | Gm02:44583850      | TATTTAAGAGTTAAAGTATTTTTGAATGTATTC   | TTATTTAAGAGTTAAAGTATTTTTGAATGTATTT    | CTCCAGTACTTGATATGATGCTGTGTTAAA |
| MU-Gm02-07 | G    | A      | G        | Gm02:44600617      | TCCAAAATTTGAGATCAAGGTTGTTGGT        | CAAAAATTTGAGATCAAGGTTGTTGGC           | GCAACCCTTAGTCACTTGATCTATCAATT  |
| MU-Gm02-08 | A    | T      | A        | Gm02:44601276      | CCACGAGTTGCCTAATGAAAAAATTAC         | ATTAACCACGAGTTGCCTAATGAAAAAATTAT      | CTCCTAACCCCCACGACATATAAATAATA  |
| MU-Gm02-09 | G    | G      | A        | Gm02:44617603      | TAATTATTC AATTAATGTATATAGAACATGCATG | ATTAATTATTC AATTAATGTATATAGAACATGCATA | CAGTTC AATGTAAGGATAGTGATATACAT |
| MU-Gm02-10 | G    | K      | T        | Gm02:44671919      | GCCAAACATTTTATTGTATATACATACACG      | AAAGCCAAACATTTTATTGTATATACATACACT     | GTGGAGCACCCCTTTGCCCAAT         |
| MU-Gm02-11 | T    | T      | C        | Gm02:44671940      | GCACCCTTTGCCCAATACTCA               | CACCCTTTGCCCAATACTCG                  | GGCCACAATGCAAGAATCTATCAAGATAA  |
| MU-Gm02-13 | C    | T      | C        | Gm02:44735733      | TAATTAATTAAGATGAAGATGCTAAGACCGA     | ATTAATTAAGATGAAGATGCTAAGACCGG         | TTCATGCATCATAGGCCAATTAGGTTTGT  |
| MU-Gm02-14 | T    | T      | C        | Gm02:44835549      | TTAATACTACTTTTATGCTAGAGTAAGATAACA   | ATACTACTTTTATGCTAGAGTAAGATAACG        | ACAGCTTTAACCAGGTGAGAGTTAGAAA   |
| MU-Gm02-15 | C    | C      | T        | Gm02:45035177      | CTCAAGCTTAAGGATAGAGATTTCCAAG        | CTCAAGCTTAAGGATAGAGATTTCCAAA          | CCAAGTAGAAAACCTCTCTGAGAGA      |
| MU-Gm02-16 | C    | T      | C        | Gm02:45099312      | TATTATAAAATTC AACAACCTTATCTGAATAAT  | ATTATTATAAAATTC AACAACCTTATCTGAATAAC  | GTTTGAAAAGAAATAGGTAATAGTTTGATA |

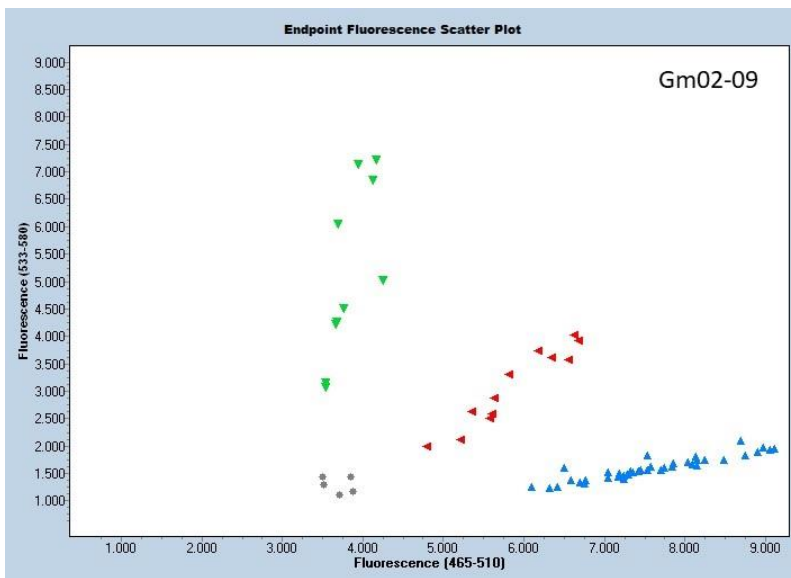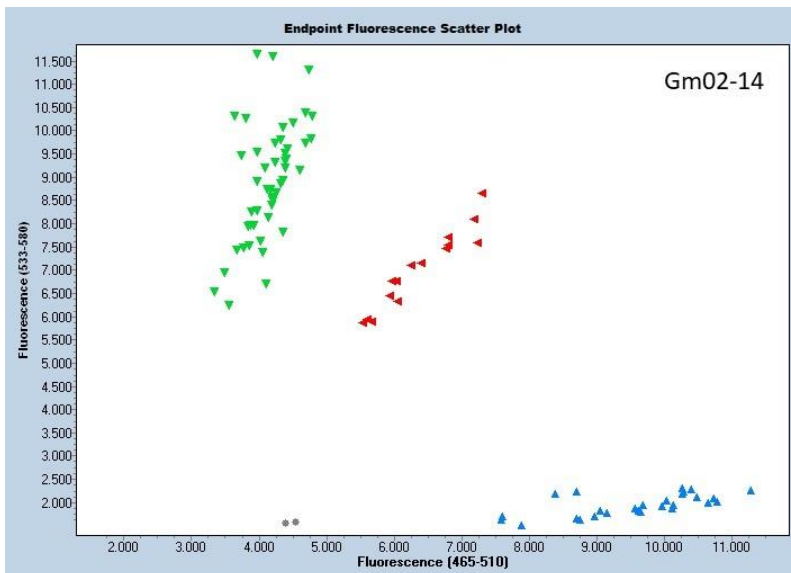

**Supplementary Figure 8.** (a) Fine-mapping of QTL02 in  $F_{4:5}$  lines derived from heterozygous  $F_{3:4}$  lines of PI 90763 x Peking. QTL02 has been fine-mapped to the region between markers Gm02-09 and Gm02-14. The 218 kb region (Gm02:44617603–44835549; Wm82.a2) contains 34 genes including *GmSNAP02* gene (*Glyma.02g260400*). All lines carry homozygous *rhg1-a*, *rhg2*, and *Rhg4*, but not QTL12. Black vertical lines signify recombination spots. The score between resistance (R) and moderate resistance (MR) was estimated based on standardized female index classification system (Schmitt and Shannon 1992) and confirmed with Tukey HSD test.

|               | Gm02_42012522_T_C | Gm02-09 (Gm02_44617603) | Gm02-14 (Gm02_44835549) | Gm02-15 (Gm02_45035177) | Gm02-16 (Gm02_45099312) | Gm02_46462690_T_C | NO. LINES | FI MIN | FI MAX | FI AV | SCORE |
|---------------|-------------------|-------------------------|-------------------------|-------------------------|-------------------------|-------------------|-----------|--------|--------|-------|-------|
| PI 90763      | TT                | AA                      | CC                      | TT                      | CC                      | TT                | 2         | 0      | 0.2    | 0.1   | R     |
| Peking        | CC                | GG                      | TT                      | CC                      | TT                      | CC                | 2         | 16     | 24     | 20    | MR    |
| 19AS-84-5-74  | CC                | GG                      | TT                      | CC                      | TT                      | CC                | 4         | 14     | 15     | 14.4  | MR    |
|               | CC                | GG                      | TT                      | CC                      | TT                      | TT                | 2         | 15     | 16     | 15.5  | MR    |
| 19AS-84-3-26  | TT                | AA                      | CC                      | TT                      | CC                      | CC                | 3         | 0      | 0.1    | 0     | R     |
|               | TT                | AA                      | CC                      | TT                      | CC                      | TT                | 4         | 0      | 0.1    | 0     | R     |
| 19AS-84-2-95  | TT                | AA                      | CC                      | TT                      | CC                      | CC                | 5         | 0      | 0.6    | 0.2   | R     |
|               | TT                | AA                      | CC                      | TT                      | CC                      | TT                | 1         | 0      | 0      | 0     | R     |
| 19AS-84-5-81  | CC                | GG                      | TT                      | CC                      | TT                      | CC                | 5         | 13     | 18     | 15    | MR    |
|               | TT                | AA                      | CC                      | TT                      | CC                      | CC                | 6         | 0      | 0.1    | 0     | R     |
|               | CT                | GA                      | TC                      | CT                      | TC                      | CC                | 3         | 1      | 6      | 3.2   | R     |
| 19AS-84-2-97  | CC                | GG                      | TT                      | CC                      | TT                      | CC                | 6         | 15     | 22     | 17.9  | MR    |
|               | TT                | AA                      | CC                      | TT                      | TT                      | CC                | 2         | 0      | 0.2    | 0.1   | R     |
|               | CT                | GA                      | TC                      | CT                      | TT                      | CC                | 3         | 5      | 12     | 8.3   | R     |
| 19AS-84-3-32  | TT                | GG                      | TT                      | CC                      | TT                      | CC                | 4         | 15     | 17     | 15.9  | MR    |
|               | TT                | GG                      | TT                      | TT                      | CC                      | TT                | 6         | 11     | 21     | 14.9  | MR    |
| 19AS-84-5-80  | CC                | GG                      | CC                      | TT                      | CC                      | TT                | 3         | 10     | 14     | 11.7  | MR    |
|               | TT                | AA                      | CC                      | TT                      | CC                      | TT                | 3         | 0      | 0      | 0     | R     |
| 19AS-84-3-37  | TT                | GG                      | TT                      | CC                      | TT                      | CC                | 5         | 14     | 15     | 14    | MR    |
|               | TT                | AA                      | CC                      | TT                      | CC                      | TT                | 4         | 0      | 0.2    | 0.1   | R     |
| 19AS-84-5-92  | CC                | GG                      | TT                      | CC                      | TT                      | CC                | 2         | 10     | 16     | 13    | MR    |
|               | CC                | AA                      | CC                      | TT                      | CC                      | TT                | 5         | 0      | 0.2    | 0     | R     |
|               | CC                | GA                      | TC                      | CT                      | TC                      | CT                | 2         | 5      | 6      | 5.5   | R     |
| 19AS-84-1-6   | CC                | GG                      | TT                      | CC                      | TT                      | CC                | 5         | 19     | 31     | 22.6  | MR    |
|               | TT                | AA                      | CC                      | TT                      | CC                      | TT                | 7         | 0      | 0.2    | 0.2   | R     |
|               | CT                | GA                      | TC                      | CT                      | TC                      | CT                | 3         | 2      | 7      | 3.8   | R     |
| 19AS-84-3-54  | CC                | GG                      | TT                      | CC                      | TT                      | TT                | 5         | 15     | 17     | 16.2  | MR    |
| 19AS-84-2-122 | CC                | GG                      | TT                      | CC                      | TT                      | CT                | 6         | 11     | 24     | 18    | MR    |
| 19AS-84-1-9   | CC                | GG                      | TT                      | CC                      | TT                      | CT                | 3         | 14     | 17     | 15.5  | MR    |
| 19AS-84-5-79  | CC                | AA                      | CC                      | TT                      | CC                      | TT                | 6         | 0      | 0.1    | 0     | R     |
| 19AS-84-5-90  | CC                | AA                      | CC                      | TT                      | CC                      | TT                | 6         | 0      | 0.1    | 0.1   | R     |
| 19AS-84-3-49  | TT                | GG                      | TT                      | CC                      | TT                      | CC                | 6         | 17     | 26     | 21.9  | MR    |
| 19AS-84-2-114 | CC                | GG                      | TT                      | CC                      | TT                      | CC                | 6         | 18     | 23     | 20    | MR    |

**Supplementary Figure 8.** (b) Thirty-four candidate genes in the 218 Kbp fine-mapped region (Gm02:44617603–44835549; Wm82.a2). *The GmSNAP02 gene (Glyma.02g260400) marked in red.* Eleven genes highlighted in yellow represent a duplicated segment of chromosome 18 that includes the *GmSNAP18* gene.

| Gene Model             | Position (Wm82.v2.a1)  | Protein/Function                                   |
|------------------------|------------------------|----------------------------------------------------|
| <i>Glyma.02g259100</i> | Gm02_44623147-44626024 | Plant protein of unknown function                  |
| <i>Glyma.02g259200</i> | Gm02_44628805-44629878 | N/A                                                |
| <i>Glyma.02g259300</i> | Gm02_44632522-44634801 | Peroxidase                                         |
| <i>Glyma.02g259400</i> | Gm02_44639898-44642041 | Oligopeptide transporter-related protein           |
| <i>Glyma.02g259500</i> | Gm02_44651207-44654419 | Peroxidase                                         |
| <i>Glyma.02g259600</i> | Gm02_44654567-44657064 | N/A                                                |
| <i>Glyma.02g259700</i> | Gm02_44658495-44659805 | Hypoxia-responsive family protein                  |
| <i>Glyma.02g259800</i> | Gm02_44662823-44664812 | N/A                                                |
| <i>Glyma.02g259900</i> | Gm02_44675719-44677278 | N/A                                                |
| <i>Glyma.02g260000</i> | Gm02_44682536-44683450 | Protein of unknown function                        |
| <i>Glyma.02g260100</i> | Gm02_44684684-44688689 | Transmembrane amino acid transporter protein       |
| <i>Glyma.02g260200</i> | Gm02_44688786-44689712 | Transmembrane amino acid transporter protein       |
| <i>Glyma.02g260300</i> | Gm02_44689952-44693546 | Transmembrane amino acid transporter protein       |
| <i>Glyma.02g260400</i> | Gm02_44695637-44698195 | Alpha-soluble NSF attachment protein               |
| <i>Glyma.02g260500</i> | Gm02_44701769-44704798 | Protein of unknown function                        |
| <i>Glyma.02g260600</i> | Gm02_44706034-44708734 | Staphylococcal nuclease homologue                  |
| <i>Glyma.02g260700</i> | Gm02_44711909-44712658 | Copper chaperone                                   |
| <i>Glyma.02g260800</i> | Gm02_44714204-44715022 | N/A                                                |
| <i>Glyma.02g260900</i> | Gm02_44716758-44717484 | Arogenate dehydrogenase                            |
| <i>Glyma.02g261000</i> | Gm02_44718291-44721287 | N/A                                                |
| <i>Glyma.02g261100</i> | Gm02_44726522-44728449 | Prenylated rab acceptor 1                          |
| <i>Glyma.02g261200</i> | Gm02_44740164-44742226 | Cell division cycle protein D123                   |
| <i>Glyma.02g261300</i> | Gm02_44740814-44741095 | Cell division cycle protein D123                   |
| <i>Glyma.02g261400</i> | Gm02_44744143-44747306 | Leucine-rich repeat receptor-like protein kinase   |
| <i>Glyma.02g261500</i> | Gm02_44747676-44753250 | Sorting nexin                                      |
| <i>Glyma.02g261600</i> | Gm02_44758969-44763198 | Multicopper oxidase                                |
| <i>Glyma.02g261700</i> | Gm02_44767828-44776703 | AP2 DNA-binding domain                             |
| <i>Glyma.02g261800</i> | Gm02_44776099-44783352 | DNA repair protein, helicase                       |
| <i>Glyma.02g261900</i> | Gm02_44792699-44793865 | Polyketide cyclase / dehydrase and lipid transport |
| <i>Glyma.02g262000</i> | Gm02_44798967-44799846 | N/A                                                |
| <i>Glyma.02g262100</i> | Gm02_44802750-44805813 | GDSL/SGNH-like Acyl-Esterase family                |
| <i>Glyma.02g262200</i> | Gm02_44812653-44814835 | Glycosyl hydrolase family 85                       |
| <i>Glyma.02g262300</i> | Gm02_44820777-44831595 | Glycosyl hydrolase family 85                       |
| <i>Glyma.02g262400</i> | Gm02_44834256-44835310 | Protein of unknown function                        |

**WHOLE GENOME  
SEQUENCING READS  
SUPPLEMENTARY DATA**

**Supplementary Figure 9.** Soybean Allele Catalog (<https://www.soykb.org>) displaying 11 variant alleles of the *GmSNAP02* gene. PI 90763 and Peking (PI 548402) displays the same allele as Williams 82 reference genome (Wm82.a2). Red font in PI 90763 indicates imputed variants.

| Soja                        | Landrace | Elite | Total | Cultivar | 44695733       | 44695753                        | 44695865 | 44695950                                 | 44695972                  | 44696001                                                    | 44696179                                           | 44696184                              | 44697215 | 44697321 | 44697698                    | 44697700 |                   |
|-----------------------------|----------|-------|-------|----------|----------------|---------------------------------|----------|------------------------------------------|---------------------------|-------------------------------------------------------------|----------------------------------------------------|---------------------------------------|----------|----------|-----------------------------|----------|-------------------|
| 34                          | 221      | 238   | 548   | 87       | AATATGGGCG Ref | GAGGGCCGAGGAT<br>TTTGAGAACA Alt | A Ref    | AG Ref                                   | TAC Ref                   | GGTAAC Ref                                                  | A Ref                                              | T Ref                                 | C Ref    | T Ref    | CT Ref                      | G Ref    |                   |
| 72                          | 231      | 141   | 497   | 51       | AATATGGGCG Ref | CAGGGCCGAGGAT<br>TTTGAGAACA Ref | A Ref    | AG Ref                                   | TAC Ref                   | GGTAAC Ref                                                  | A Ref                                              | T Ref                                 | C Ref    | T Ref    | CT Ref                      | G Ref    |                   |
| 0                           | 5        | 2     | 7     | 2        | AATATGGGCG Ref | C frameshift_variant A8fs       | A Ref    | AG Ref                                   | TAC Ref                   | GGTAAC Ref                                                  | A Ref                                              | T Ref                                 | C Ref    | T Ref    | CT Ref                      | G Ref    |                   |
| 0                           | 4        | 0     | 4     | 0        | AATATGGGCG Ref | CAGGGCCGAGGAT<br>TTTGAGAACA Ref | A Ref    | AG Ref                                   | T frameshift_variant 57fs | GGTAAC Ref                                                  | A Ref                                              | T Ref                                 | C Ref    | T Ref    | CT Ref                      | G Ref    |                   |
| 2                           | 0        | 0     | 2     | 0        | AATATGGGCG Ref | CAGGGCCGAGGAT<br>TTTGAGAACA Ref | A Ref    | A splice_acceptor_variant&intron_variant | TAC Ref                   | GGTAAC Ref                                                  | A Ref                                              | T Ref                                 | C Ref    | T Ref    | CT Ref                      | G Ref    |                   |
| 2                           | 0        | 0     | 2     | 0        | AATATGGGCG Ref | CAGGGCCGAGGAT<br>TTTGAGAACA Ref | A Ref    | AG Ref                                   | TAC Ref                   | GGTAAC Ref                                                  | AAT frameshift_variant&splice_region_variant E90fs | T Ref                                 | C Ref    | T Ref    | CT Ref                      | G Ref    |                   |
| 1                           | 0        | 0     | 1     | 0        | AATATGGGCG Ref | CAGGGCCGAGGAT<br>TTTGAGAACA Ref | A Ref    | AG Ref                                   | TAC Ref                   | GGTAAC Ref                                                  | A Ref                                              | A splice_donor_variant&intron_variant | C Ref    | T Ref    | CT Ref                      | G Ref    |                   |
| 0                           | 1        | 0     | 1     | 0        | AATATGGGCG Ref | CAGGGCCGAGGAT<br>TTTGAGAACA Ref | T K44*   | AG Ref                                   | TAC Ref                   | GGTAAC Ref                                                  | A Ref                                              | T Ref                                 | C Ref    | T Ref    | CT Ref                      | G Ref    |                   |
| 0                           | 1        | 0     | 1     | 0        | AATATGGGCG Ref | CAGGGCCGAGGAT<br>TTTGAGAACA Ref | A Ref    | AG Ref                                   | TAC Ref                   | G splice_donor_variant&splice_region_variant&intron_variant | A Ref                                              | T Ref                                 | C Ref    | T Ref    | CT Ref                      | G Ref    |                   |
| 0                           | 1        | 0     | 1     | 0        | AATATGGGCG Ref | CAGGGCCGAGGAT<br>TTTGAGAACA Ref | A Ref    | AG Ref                                   | TAC Ref                   | GGTAAC Ref                                                  | A Ref                                              | T Ref                                 | C Ref    | T Ref    | C frameshift_variant E252fs | A E252K  |                   |
| 0                           | 1        | 0     | 1     | 0        | AATATGGGCG Ref | CAGGGCCGAGGAT<br>TTTGAGAACA Ref | A Ref    | AG Ref                                   | TAC Ref                   | GGTAAC Ref                                                  | A Ref                                              | T Ref                                 | C Ref    | C L204P  | CT Ref                      | G Ref    |                   |
| 0                           | 1        | 0     | 1     | 0        | AATATGGGCG Ref | CAGGGCCGAGGAT<br>TTTGAGAACA Ref | A Ref    | AG Ref                                   | TAC Ref                   | GGTAAC Ref                                                  | A Ref                                              | T Ref                                 | T Q169*  | T Ref    | CT Ref                      | G Ref    |                   |
|                             |          |       |       |          |                |                                 |          |                                          |                           |                                                             |                                                    |                                       |          |          |                             |          | <b>Imputation</b> |
| PI 90763 (USB-054_PI090763) |          |       |       |          | AATATGGGCG Ref | CAGGGCCGAGGAT<br>TTTGAGAACA Ref | A Ref    | AG Ref                                   | TAC Ref                   | GGTAAC Ref                                                  | A Ref                                              | T Ref                                 | C Ref    | T Ref    | CT Ref +                    | G Ref +  | +                 |
| Peking (USB-027_PI548402)   |          |       |       |          | AATATGGGCG Ref | CAGGGCCGAGGAT<br>TTTGAGAACA Ref | A Ref    | AG Ref                                   | TAC Ref                   | GGTAAC Ref                                                  | A Ref                                              | T Ref                                 | C Ref    | T Ref    | CT Ref                      | G Ref    | -                 |

**Supplementary Figure 10.** JBrowse output of copy number variation (CNV) of *GmSNAP02* gene (*Glyma.02G260400*): (a) CNV was unlikely at *GmSNAP02* in PI 90763; (b) Internal validation of CNV at *Rhg1* confirmed different copy numbers at *GmSNAP18* between PI 88788 and PI 90763.

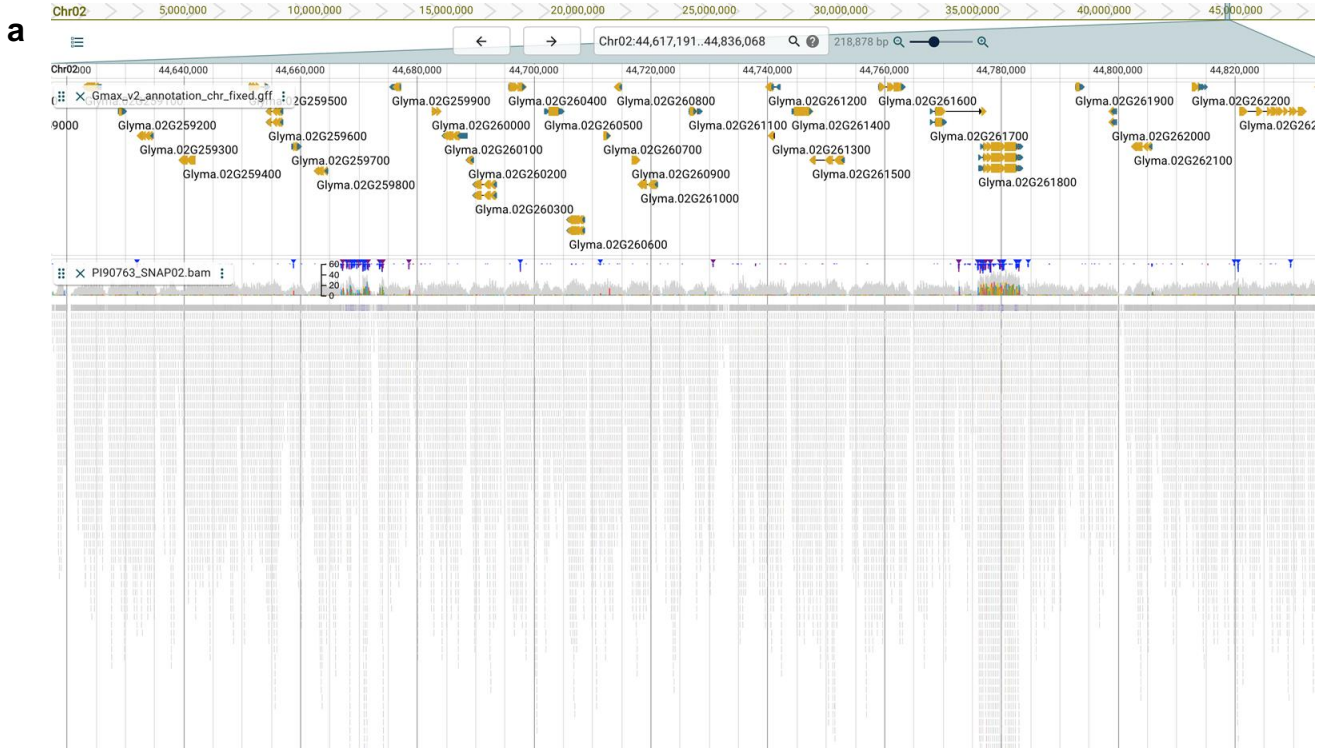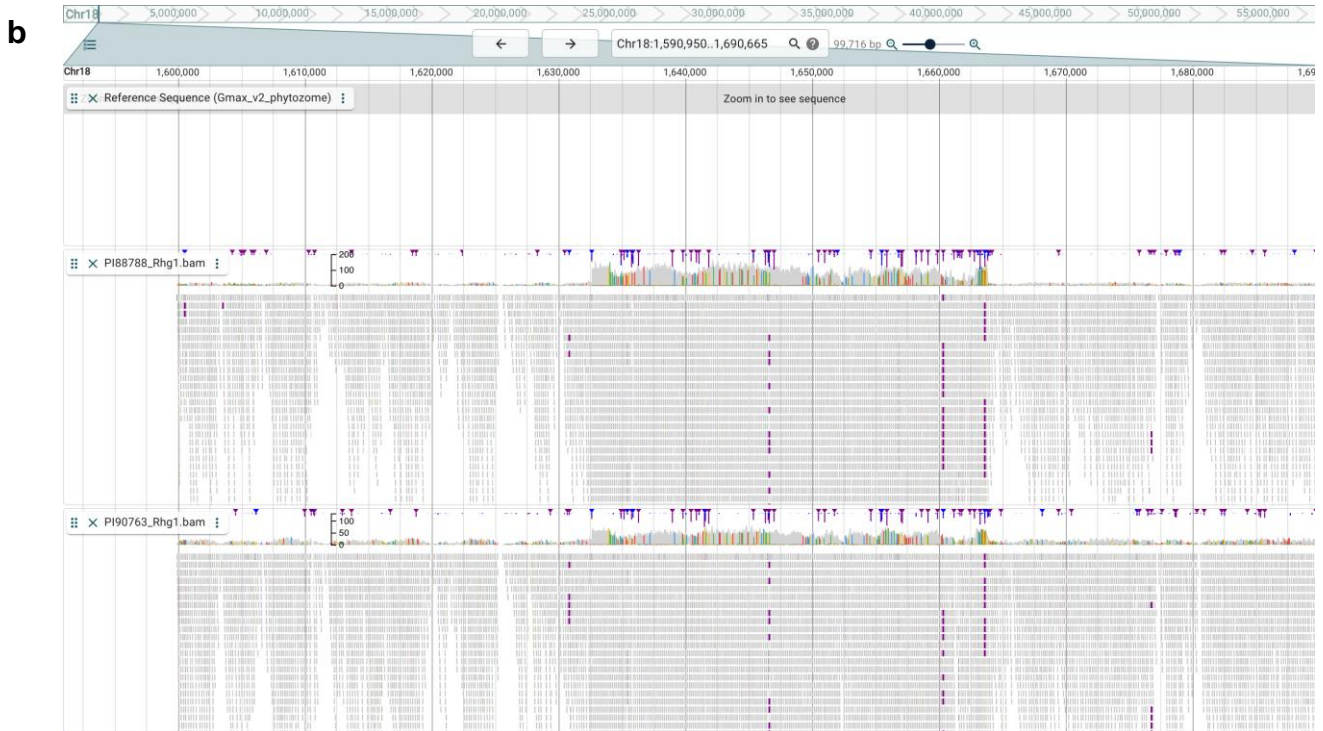



**Supplementary Figure 11.** Whole genome resequencing-derived variant calls in PI 90763, Peking, PI 437654, and Williams 82 across the *GmSNAP02* gene: (a) A pattern of reads with poor alignment (multicolored) in the eighth exon of the gene in PI 90763, and 22 nt deletion in exon 1 in PI 437654. The dashed box signifies the place of the insertion in PI 90763 and deletion in PI 437654. The boxes on the right show enlarged view. (b) hypothesis of how a putative insertion in exon 8 of PI 90763 could be excluded from the alignment data.

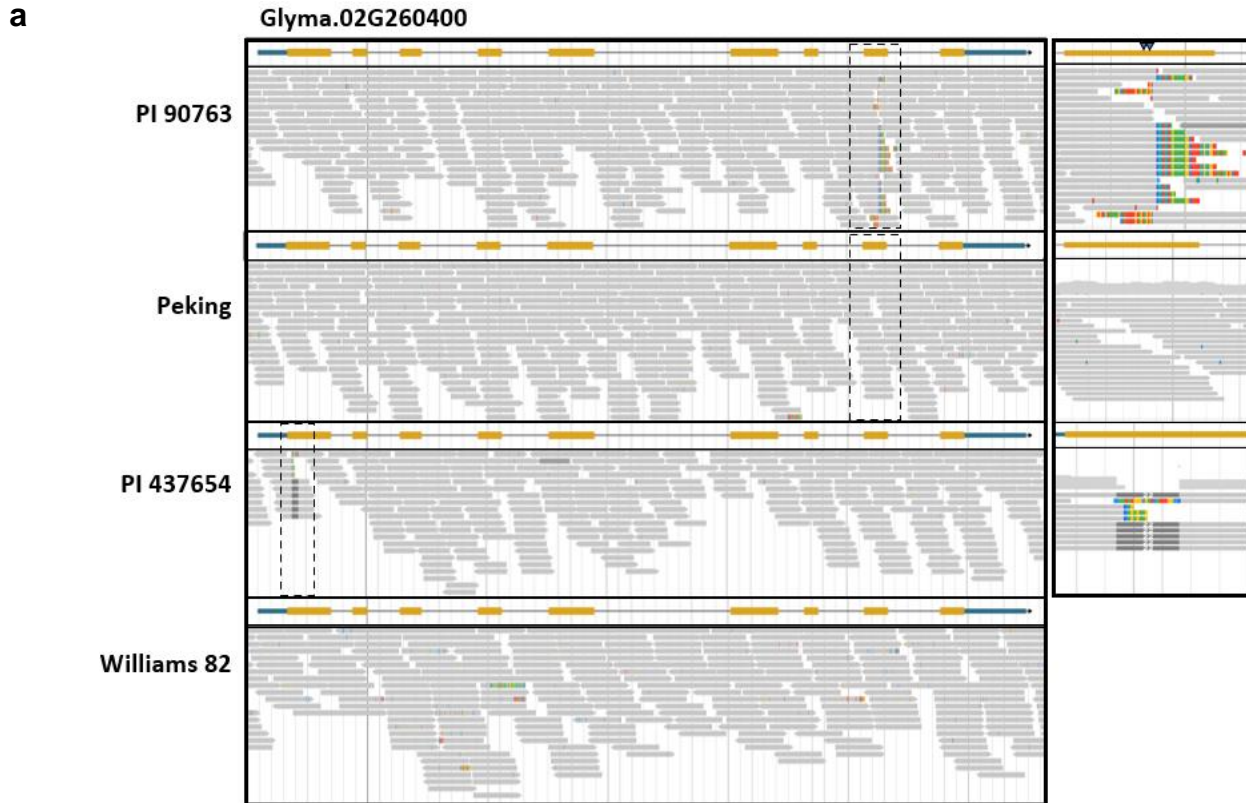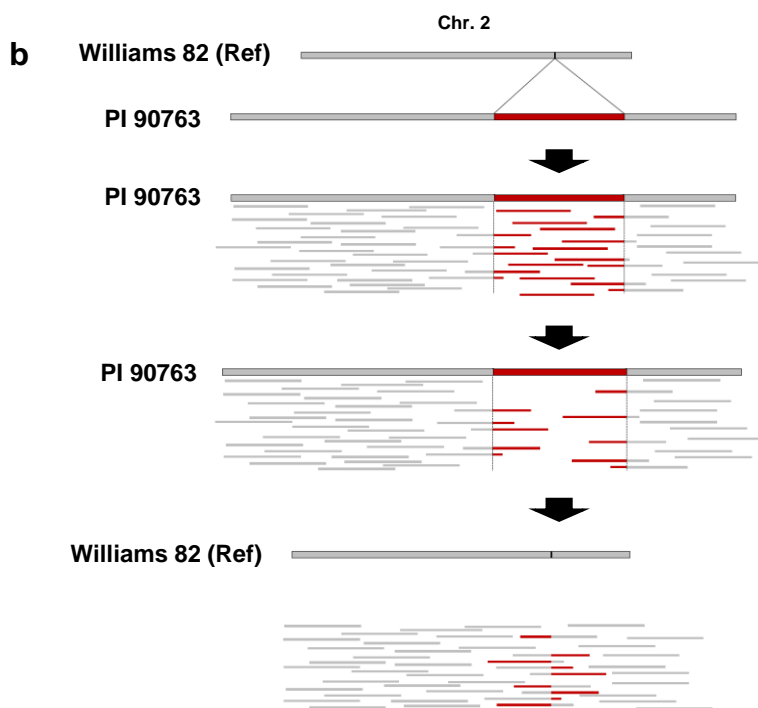

## Supplementary Figure 12. Summary of primers used in this research.

| Purpose                                                                     | Primer name       | Sequence 5'-3'               |
|-----------------------------------------------------------------------------|-------------------|------------------------------|
| Amplify the fragment flanking the insertion of <i>GmSNAP02</i> from gDNA    | F1                | CTGACCTTCCTGTGTAC            |
|                                                                             | R1                | ACCGAAAGAAGACCATGG           |
| To amplify full length <i>GmSNAP02</i> transcript from cDNA                 | F2                | ATGAAAGAGAGAGCATTAAATTGAATTG |
|                                                                             | R2                | CCAACCGAAAGAAGACCATGG        |
| <i>GmSNAP02</i> qRT-PCR primers                                             | qRT-PCR - F       | TTGTACGAGTCTGAACAGAATATCTC   |
|                                                                             | qRT-PCR - R       | CTCAATTGATCTCTGATATTGTTCA    |
| Genotyping <i>GmSNAP02</i> T4+T3 edited roots                               | F3                | ATGAAAGAGAGAGCATTAAATTGAATTG |
|                                                                             | R3                | GCAGATGTTTCATGCATTATTATC     |
| Genotyping <i>GmSNAP02</i> T5+T7 edited roots                               | F4                | GGTCGCGGTAATTAATCAACAT       |
|                                                                             | R4                | TCCAACAGCTATTTCACTTGTC       |
| To check off-targets in <i>GmSNAP02</i> -T4+T3 transformed roots            | F5                | CATAGATTGCATGAAAGAGAGGG      |
|                                                                             | R5                | CCAACAAACATAGAACAATAGAAG     |
| To check off-targets in <i>GmSNAP02</i> -T5+T7 transformed roots            | F6                | GCATGTTTGCCTGAATGTTG         |
|                                                                             | R6                | CTCACTCGTCTACTTAAGCAAGC      |
| Primers to generate gRNA fragments                                          | T3 - F            | GATTGTCTGAACAGAATATCTCGC     |
|                                                                             | T3 - R            | AAACGCGAGATATTCTGTTTCAGAC    |
|                                                                             | T4 - F            | GATTGTATGGGCGATCATTGGCCA     |
|                                                                             | T4 - R            | AAACTGGCCAAATGATCGCCATAC     |
|                                                                             | T5 - F            | GATTGACTCAAAGCCAAAGAAATCG    |
|                                                                             | T5 - R            | AAACCGATTTCTTTGGCTTTGAGTC    |
|                                                                             | T7 - R            | AAACTGGTCTTCTTTGCGTTGGATC    |
| Primers for sequencing the <i>Atu6</i> -gDNA constructs in <i>AtU6-26SK</i> | M13R              | CACAGGAAACAGCTATGAC          |
|                                                                             | SS42 (Sequencing) | TCCCAGGATTAGAATGATTAGG       |
| Primers to check final vector construct by PCR                              | SS42              | TCCCAGGATTAGAATGATTAGG       |
|                                                                             | Cas9 - F          | GCCCAAGAGGAACAGAGTAAGC       |
|                                                                             | Cas9 - R          | CAGTTCGCCGGCAGAGGCCAGC       |

**Supplementary Figure 13.** (a) Alignment of full-length cDNA sequences of *GmSNAP02* from Williams 82, Peking, and PI 437654. The cDNA sequences of *GmSNAP02* from Williams 82 and Peking were identical, while PI 437654 had a 22 nt deletion at the 5' end.

|          |                                                                       |       |
|----------|-----------------------------------------------------------------------|-------|
| Wm82     | ATGGGCGATCATTGGCCAGGGCCGAGGATTTTGAGAACAAGGCAGAGAAGAACTCAGC            | 60    |
| Peking   | ATGGGCGATCATTGGCCAGGGCCGAGGATTTTGAGAACAAGGCAGAGAAGAACTCAGC            | 60    |
| PI437654 | ATGGGCGATCATTGGCC-----AGGCAGAGAAGAACTCAGC                             | 38    |
|          | *****                                                                 | ***** |
| Wm82     | AGTTGGGGCTTGTGGCTCCAAATTCGAGGACGCTGCTGATCTCTTCGACAAATCCGCC            | 120   |
| Peking   | AGTTGGGGCTTGTGGCTCCAAATTCGAGGACGCTGCTGATCTCTTCGACAAATCCGCC            | 120   |
| PI437654 | AGTTGGGGCTTGTGGCTCCAAATTCGAGGACGCTGCTGATCTCTTCGACAAATCCGCC            | 98    |
|          | *****                                                                 | ***** |
| Wm82     | AATTCCTATAAGCTCGCTAAATCATGGGACAAAGCAGGATCCACCTACATCAAATTAGCG          | 180   |
| Peking   | AATTCCTATAAGCTCGCTAAATCATGGGACAAAGCAGGATCCACCTACATCAAATTAGCG          | 180   |
| PI437654 | AATTCCTATAAGCTCGCTAAATCATGGGACAAAGCAGGATCCACCTACATCAAAT <b>TAC</b> CG | 158   |
|          | *****                                                                 | ***** |
| Wm82     | AGTTGTCATTTGAAGTTGGAAGCAAGCATGAAGCTGCACAAGCTTATGTTGACGCTGCG           | 240   |
| Peking   | AGTTGTCATTTGAAGTTGGAAGCAAGCATGAAGCTGCACAAGCTTATGTTGACGCTGCG           | 240   |
| PI437654 | AGTTGTCATTTGAAGTTGGAAGCAAGCATGAAGCTGCACAAGCTTATGTTGACGCTGCG           | 218   |
|          | *****                                                                 | ***** |
| Wm82     | CGTTGCTATAAAAACTAATATAAATGAGTCTGTATCTTGCTTAGACAATGCTGTAAT             | 300   |
| Peking   | CGTTGCTATAAAAACTAATATAAATGAGTCTGTATCTTGCTTAGACAATGCTGTAAT             | 300   |
| PI437654 | CGTTGCTATAAAAACTAATATAAATGAGTCTGTATCTTGCTTAGACAATGCTGTAAT             | 278   |
|          | *****                                                                 | ***** |
| Wm82     | ATTTTCTGTGAGATTGGAAGACTCTCTATGGCTGCTAGATATTTGAAGGAAATGCTGAG           | 360   |
| Peking   | ATTTTCTGTGAGATTGGAAGACTCTCTATGGCTGCTAGATATTTGAAGGAAATGCTGAG           | 360   |
| PI437654 | ATTTTCTGTGAGATTGGAAGACTCTCTATGGCTGCTAGATATTTGAAGGAAATGCTGAG           | 338   |
|          | *****                                                                 | ***** |
| Wm82     | TTGTACGAGTCTGAACAGAATATCTCGCAGGCCGTTGCTTACTATGAAAAATCAGCGGAT          | 420   |
| Peking   | TTGTACGAGTCTGAACAGAATATCTCGCAGGCCGTTGCTTACTATGAAAAATCAGCGGAT          | 420   |
| PI437654 | TTGTACGAGTCTGAACAGAATATCTCGCAGGCCGTTGCTTACTATGAAAAATCAGCGGAT          | 398   |
|          | *****                                                                 | ***** |
| Wm82     | TTTTTTGAAAAATGAAGAAGTGAACACTTCAGCAAACAGTGAAGCAAAAAGTTGCTCAA           | 480   |
| Peking   | TTTTTTGAAAAATGAAGAAGTGAACACTTCAGCAAACAGTGAAGCAAAAAGTTGCTCAA           | 480   |
| PI437654 | TTTTTTGAAAAATGAAGAAGTGAACACTTCAGCAAACAGTGAAGCAAAAAGTTGCTCAA           | 458   |
|          | *****                                                                 | ***** |
| Wm82     | TTCTCTGCCAGCTTGAACAATATCAGAGATCAATTGAGATTTATGAAGATATTGCTCGC           | 540   |
| Peking   | TTCTCTGCCAGCTTGAACAATATCAGAGATCAATTGAGATTTATGAAGATATTGCTCGC           | 540   |
| PI437654 | TTCTCTGCCAGCTTGAACAATATCAGAGATCAATTGAGATTTATGAAGATATTGCTCGC           | 518   |
|          | *****                                                                 | ***** |
| Wm82     | CAGTCTCTCAGCAATACTTTGCTGAAGTATGGAGTTAAAGGGCATCTTCTTAATGCTGGC          | 600   |
| Peking   | CAGTCTCTCAGCAATACTTTGCTGAAGTATGGAGTTAAAGGGCATCTTCTTAATGCTGGC          | 600   |
| PI437654 | CAGTCTCTCAGCAATACTTTGCTGAAGTATGGAGTTAAAGGGCATCTTCTTAATGCTGGC          | 578   |
|          | *****                                                                 | ***** |
| Wm82     | ATTTGCGAACTTTGTAAGGGGATGTTATTGCTATTACCAATGCATTGGAGCGATATCAG           | 660   |
| Peking   | ATTTGCGAACTTTGTAAGGGGATGTTATTGCTATTACCAATGCATTGGAGCGATATCAG           | 660   |
| PI437654 | ATTTGCGAACTTTGTAAGGGGATGTTATTGCTATTACCAATGCATTGGAGCGATATCAG           | 638   |
|          | *****                                                                 | ***** |
| Wm82     | GACTTGGATCCAACATTTTCTGGAACACGTTGAATATAGACTTCTGGCAGATATTGCTGCT         | 720   |
| Peking   | GACTTGGATCCAACATTTTCTGGAACACGTTGAATATAGACTTCTGGCAGATATTGCTGCT         | 720   |
| PI437654 | GACTTGGATCCAACATTTTCTGGAACACGTTGAATATAGACTTCTGGCAGATATTGCTGCT         | 698   |
|          | *****                                                                 | ***** |
| Wm82     | GCAATTGATGAGGAAGATGTTGGAAGTTTACTGAAGTTATCAAGGAATTTGATAGTTTG           | 780   |
| Peking   | GCAATTGATGAGGAAGATGTTGGAAGTTTACTGAAGTTATCAAGGAATTTGATAGTTTG           | 780   |
| PI437654 | GCAATTGATGAGGAAGATGTTGGAAGTTTACTGAAGTTATCAAGGAATTTGATAGTTTG           | 758   |
|          | *****                                                                 | ***** |
| Wm82     | ACTCCTTTGGATTCTTGGAAAGACAACACTTCTTTTGGAGGTGAAAGATAAACTCAAAGCC         | 840   |
| Peking   | ACTCCTTTGGATTCTTGGAAAGACAACACTTCTTTTGGAGGTGAAAGATAAACTCAAAGCC         | 840   |
| PI437654 | ACTCCTTTGGATTCTTGGAAAGACAACACTTCTTTTGGAGGTGAAAGATAAACTCAAAGCC         | 818   |
|          | *****                                                                 | ***** |
| Wm82     | AAAGAAATCGAGGAGGATGATCTTACTTGA                                        | 870   |
| Peking   | AAAGAAATCGAGGAGGATGATCTTACTTGA                                        | 870   |
| PI437654 | AAAGAAATCGAGGAGGATGATCTTACTTGA                                        | 848   |
|          | *****                                                                 | ***** |

**Supplementary Figure 13.** (b) Alignment of amino acid sequences of GmSNAP02 from Williams 82, Peking, and PI 437654. The 22 nt deletion at the 5' end of *GmSNAP02* in PI 437654 causes a frameshift mutation resulting in a premature stop codon in the amino acid sequence.

|           |                                                                                   |     |
|-----------|-----------------------------------------------------------------------------------|-----|
| Wm82      | MGDHLARAEDFENKAEKKLSSWGLFGSKFEDAADLFDKSANSYKLAKSWDKAGSTYIKLA                      | 60  |
| Peking    | MGDHLARAEDFENKAEKKLSSWGLFGSKFEDAADLFDKSANSYKLAKSWDKAGSTYIKLA                      | 60  |
| PI 437654 | MGDHLARQRRNSAV-----<br>***** . .                                                  | 14  |
| Wm82      | SCHLKLESKHEAAQAYVDAARCYKKTNINESVSCLDNAVNI FCEIGRLSMAARYLKEIAE                     | 120 |
| Peking    | SCHLKLESKHEAAQAYVDAARCYKKTNINESVSCLDNAVNI FCEIGRLSMAARYLKEIAE                     | 120 |
| PI 437654 | -----                                                                             | 14  |
| Wm82      | LYESEQNISQAVAYYEKSADFFENEVNTSANQCKQKVAQFSAQLEQYQRSIEIYEDIAR                       | 180 |
| Peking    | LYESEQNISQAVAYYEKSADFFENEVNTSANQCKQKVAQFSAQLEQYQRSIEIYEDIAR                       | 180 |
| PI 437654 | -----                                                                             | 14  |
| Wm82      | QSLSN TLLKYGVKGHLLNAGICELCKGDVIAIT--N-----ALERYQDLDP TFSGTREY                     | 232 |
| Peking    | QSLSN TLLKYGVKGHLLNAGICELCKGDVIAIT--N-----ALERYQDLDP TFSGTREY                     | 232 |
| PI 437654 | -----GACLAPNSR TLLISSTNPPIPISSLNHG TKQDPPTS N-----<br>* * :. .: *: * :*:: . ** *. | 51  |
| Wm82      | RLLADIAAAI DEEDVGKFTEVIKEFDSL TPLDSWKT TLLLRVKDKL KAKEIEEDDLT                     | 289 |
| Peking    | RLLADIAAAI DEEDVGKFTEVIKEFDSL TPLDSWKT TLLLRVKDKL KAKEIEEDDLT                     | 289 |
| PI 437654 | -----                                                                             | 51  |

**EXPRESSION & CRISPR-CAS9  
OF *GmSNAP02*  
SUPPLEMENTARY DATA**

**Supplementary Figure 14.** Characterization of F<sub>4:5</sub> recombinant sister lines 19AS-84-5-81-8 (81-8) and 19AS-84-5-81-4 (81-4) used for expression studies.

| Line           | Pedigree          | GmSNAP18-a | GmSNAP11 | GmSHMT8 | GmSNAP2-ins | QTL border (Gm02:421252) | Gm02:03 (Gm02:446163) | Gm02:14 (Gm02:446354) | Gm02:15 (Gm02:4306177) | Gm02:16 (Gm02:4538512) | QTL border (Gm02:464260) |
|----------------|-------------------|------------|----------|---------|-------------|--------------------------|-----------------------|-----------------------|------------------------|------------------------|--------------------------|
| 19AS-84-5-81-8 | PI 90763 × Peking | ✓          | ✓        | ✓       | ✓           | T                        | Allele Y              | Allele Y              | Allele Y               | Allele Y               | C                        |
| 19AS-84-5-81-4 | PI 90763 × Peking | ✓          | ✓        | ✓       | x           | C                        | Allele X              | Allele X              | Allele X               | Allele X               | C                        |
| PI 90763       | N/A               | ✓          | ✓        | ✓       | ✓           | T                        | Allele Y              | Allele Y              | Allele Y               | Allele Y               | T                        |
| Peking         | N/A               | ✓          | ✓        | ✓       | x           | C                        | Allele X              | Allele X              | Allele X               | Allele X               | C                        |

**TN22 (HG type 1.2.5.7; Race 2)**

| Line           | Pedigree          | Rep 1 | Rep 2 | Rep 3 | Rep 4 | Rep 5 | MEAN | FI |
|----------------|-------------------|-------|-------|-------|-------|-------|------|----|
| 19AS-84-5-81-8 | PI 90763 X Peking | 0     | 0     | 0     | 1     | 0     | 0.2  | 0  |
| 19AS-84-5-81-4 | PI 90763 X Peking | 40    | 37    | 57    | 34    | 38    | 41.2 | 16 |
| PI 90763       | N/A               | 0     | 1     | 1     | 0     | 0     | 0.4  | 0  |
| Peking         | N/A               | 26    | 35    | 45    | 59    | 38    | 40.6 | 16 |

**MM26 (HG type 1.2.5.7; Race 2)**

| Line           | Pedigree          | Rep 1 | Rep 2 | Rep 3 | Rep 4 | Rep 5 | Rep 6 | Rep 7 | Rep 8 | Rep 9 | Rep 10 | MEAN | FI |
|----------------|-------------------|-------|-------|-------|-------|-------|-------|-------|-------|-------|--------|------|----|
| 19AS-84-5-81-8 | PI 90763 X Peking | 2     | 5     | 5     | 2     | 3     | 2     | 0     | 0     | 1     | 1      | 2.1  | 1  |
| 19AS-84-5-81-4 | PI 90763 X Peking | 17    | 16    | 25    | 15    | 12    | 12    | 14    | 15    | 10    | 17     | 15.3 | 9  |
| PI 90763       | N/A               | 0     | 0     | 0     | 0     | 0     | 1     | 0     | 0     | 0     | 1      | 0.2  | 0  |
| Peking         | N/A               | 30    | 21    | 17    | 14    | 24    | 26    | 28    | 21    | 34    | 16     | 23.1 | 14 |

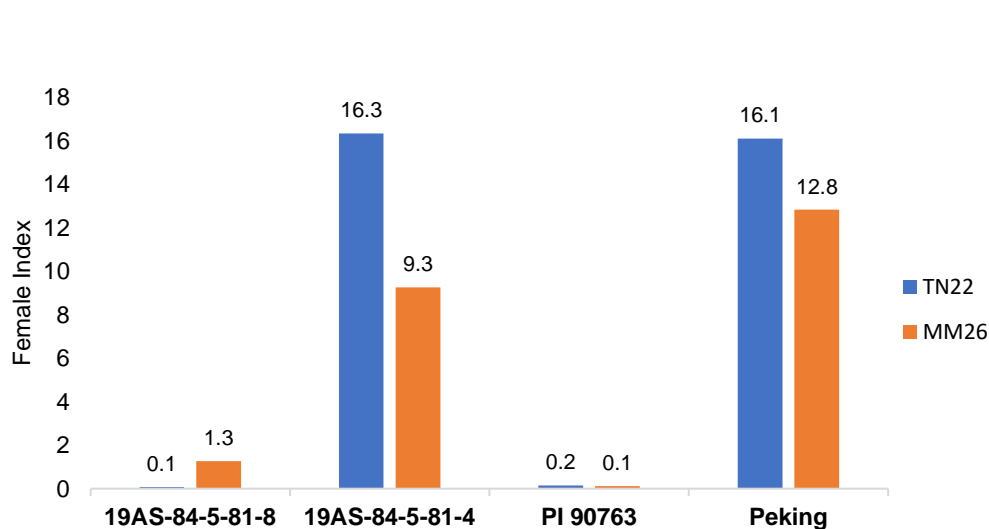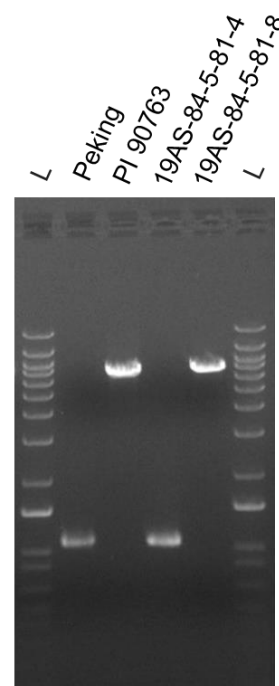

**Supplementary Figure 15.** Biological replicate 1. Peking roots transformed with CRISPR/Cas9-EV, CRISPR/Cas9-*GmSNAP02*-T4+T3, and CRISPR/Cas9-*GmSNAP02*-T5+T7 under fluorescent light. Fourteen plants with GFP-positive roots for each construct were selected for phenotyping assays. Cyst counts for each plant are indicated below the corresponding plant. Pictures taken just before transplanting and nematode inoculation.

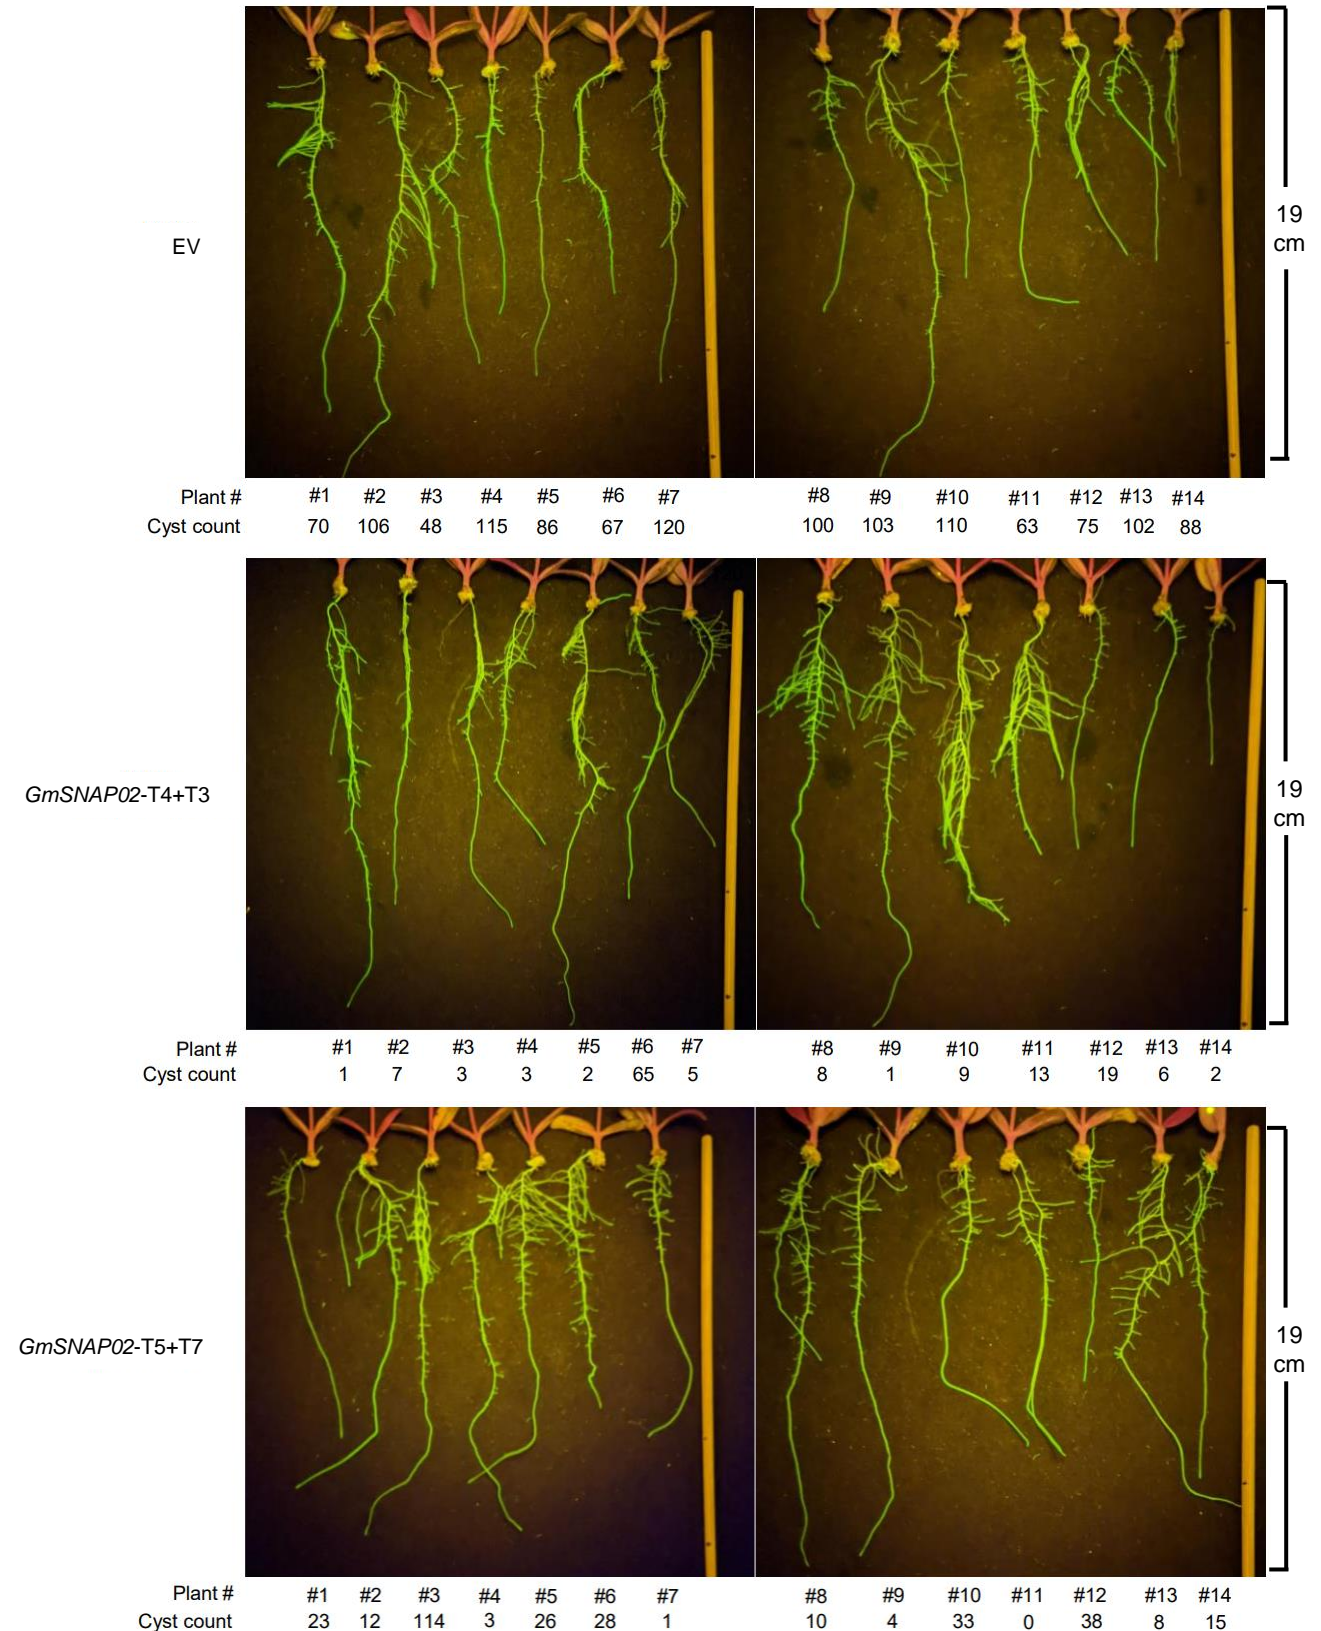







**Supplementary Figure 17.** Biological replicate 2. Peking roots transformed with CRISPR/Cas9-EV, CRISPR/Cas9-*GmSNAP02*-T4+T3, and CRISPR/Cas9-*GmSNAP02*-T5+T7 under fluorescent light. Fourteen plants with GFP-positive roots for each construct were selected for phenotyping assays. Cyst counts for each plant are indicated below the corresponding plant. Pictures taken just before transplanting and nematode inoculation.

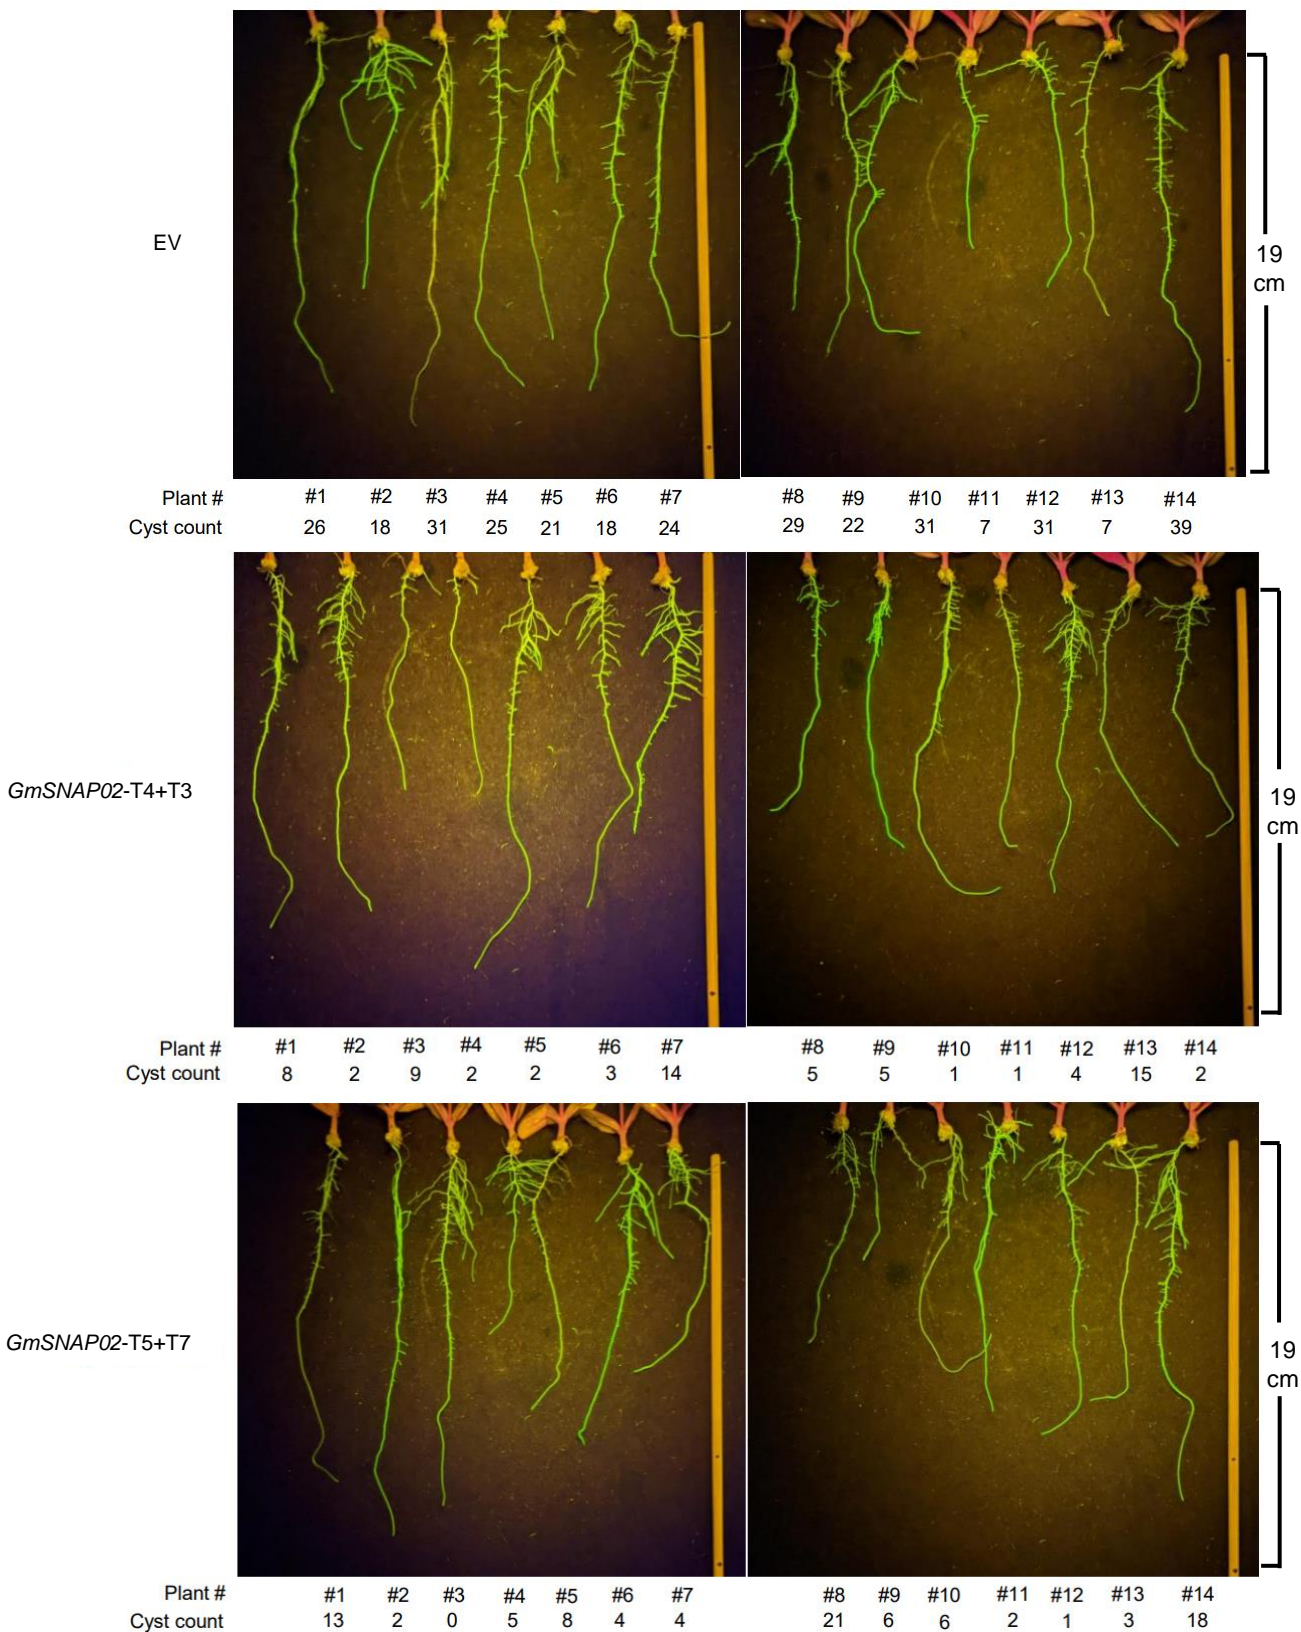





**Supplementary Figure 19.** Targeted genome editing of *GmSNAP02* in Peking and PI 90763 by CRISPR/Cas9-*GmSNAP02*-T4+T3 dual gRNA system. Genomic DNA was extracted from transgenic hairy roots and the targeted fragments were amplified by PCR. Direct sequencing of PCR products confirmed successful gene edits, as indicated by the presence of deletions/insertions and re-annealing at specific positions (marked by red triangles on the chromatograms).

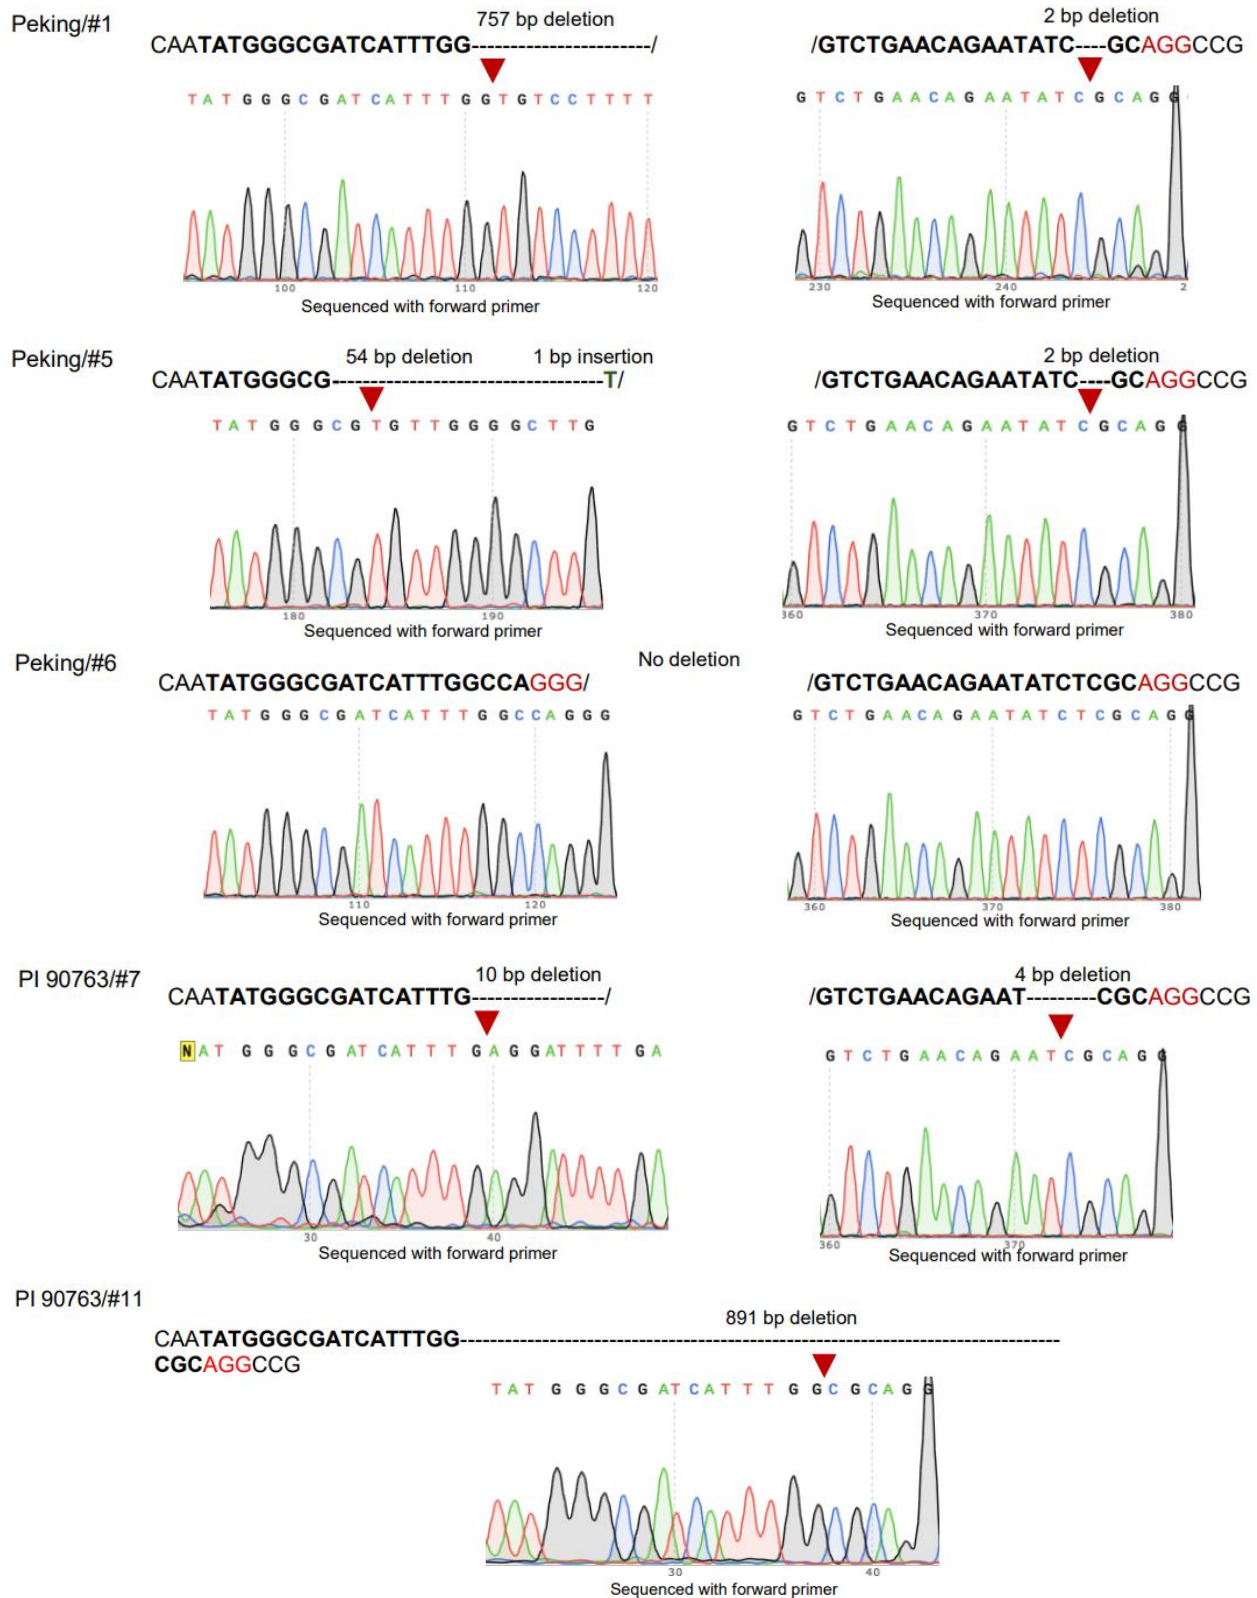

**Supplementary Figure 20.** Targeted genome editing of *GmSNAP02* in Peking and PI 90763 by CRISPR/Cas9-*GmSNAP02*-T5+T7 dual gRNA system. Genomic DNA was extracted from transgenic hairy roots, and the targeted fragments were amplified by PCR. Direct sequencing of PCR products confirmed successful gene edits, as indicated by the presence of deletions/insertions or chimeric sequences at specific positions (marked by red triangles on the chromatograms). There was no deletion in *GmSNAP02* in Peking/#3. Peking/#4 and Peking/#10 displayed complete deletion and insertions between the target sites. Similarly, the chromatogram of PI 90763 #7 and #9 showed overlapping traces, confirming successful gene editing in the targeted region.

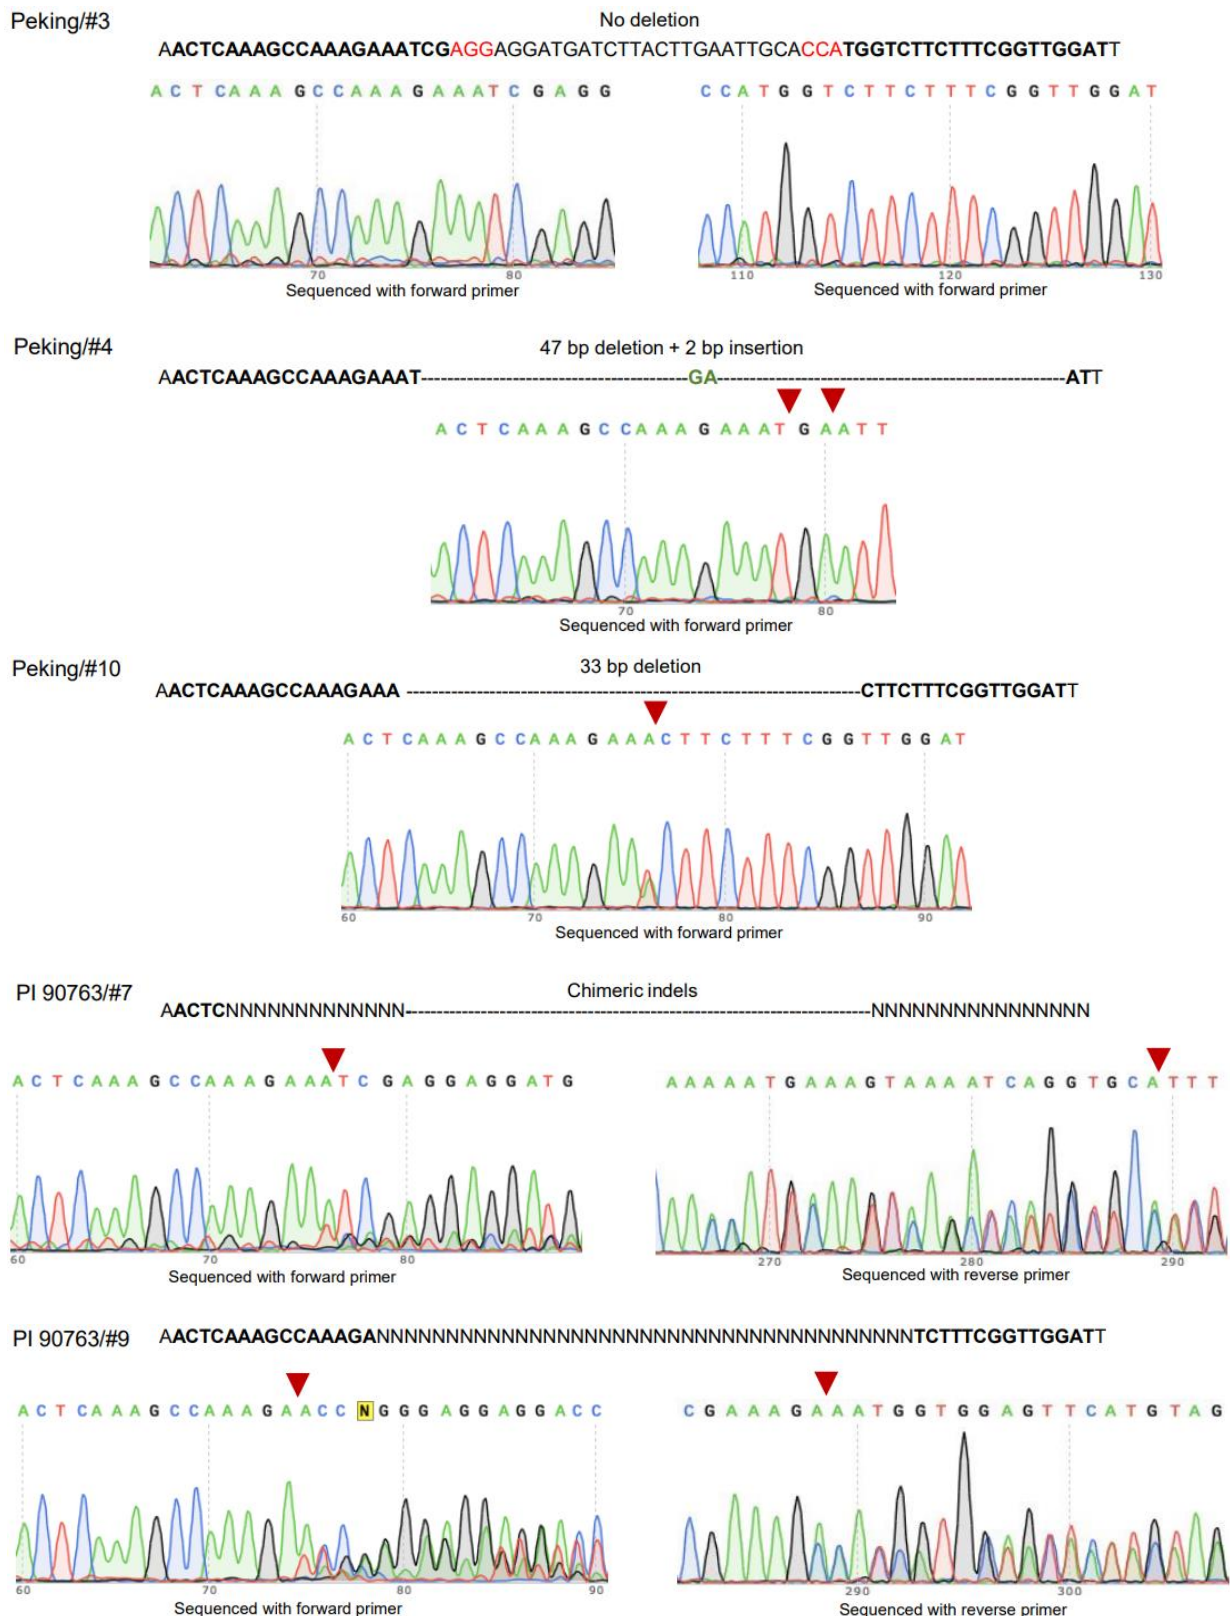

**Supplementary Figure 21.** Off-target analysis of selected Peking plants transformed with CRISPR/Cas9-*GmSNAP02*-T4+T3. The CHOPCHOP online web tool predicted one off-target sequence for each T4 and T3 gRNA sequence. Both sequences hit *GmSNAP14*, the homolog of *GmSNAP02*. (a) *GmSNAP14*-specific primers were used to amplify the region flanking the two off-target sequences. Genomic DNA was extracted from Peking EV, #1, #5, #6, and #12. The PCR analysis produced a single band with an expected length of 1,149 bp showing no deletions in *GmSNAP14*. (b) Bands from Peking plants #1 and #12 were gel extracted and sequenced. Sequencing confirmed no deletions or insertions at the expected cleavage site. (c) Chromatograms show the absence of deletions at off-target sites in *GmSNAP14*. Red arrows indicate the expected cleavage site.

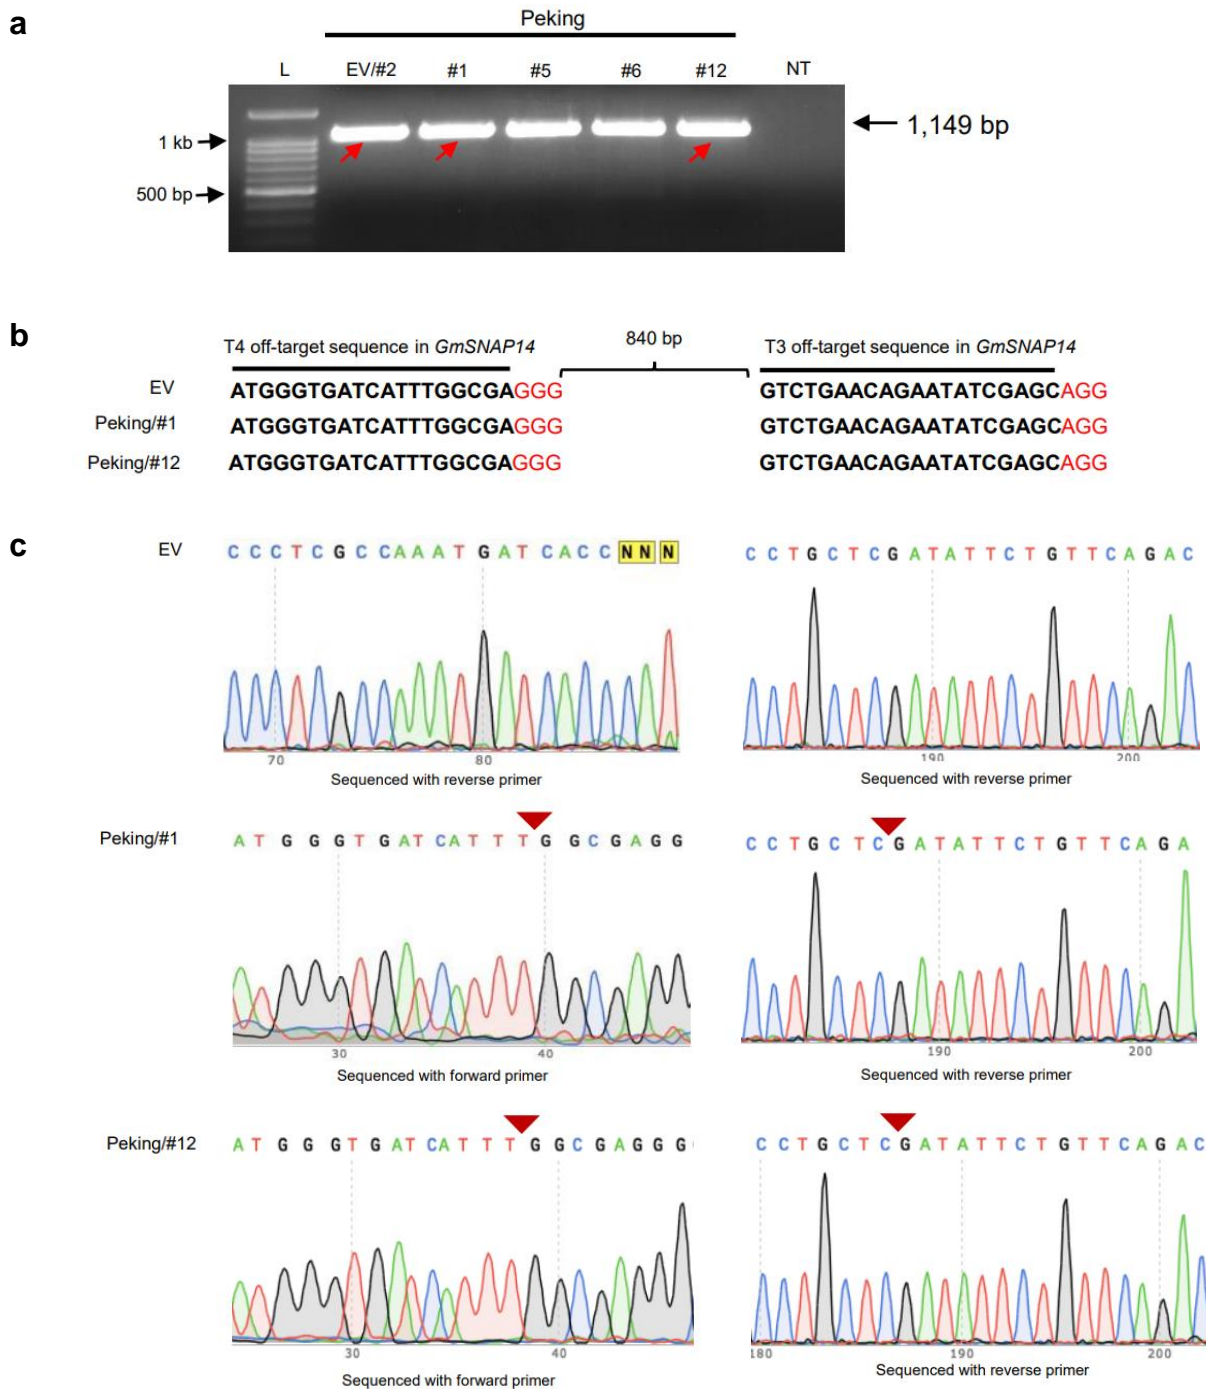



**Supplementary Figure 22.** Off-target analysis of selected Peking plants transformed with CRISPR/Cas9-*GmSNAP02*-T5+T7. The CHOPCHOP online web tool predicted one off-target sequence for each T5 and T7 gRNA sequence. Only T5 off-target sequences hit *GmSNAP14*, the homolog of *GmSNAP02*. (a) *GmSNAP14*-specific primers were used to amplify the region flanking the off-target sequences. Genomic DNA was extracted from Peking EV, #3, #4, #10, and #13. The PCR analysis produced a single band with an expected length of 413 bp showing no deletions in *GmSNAP14*. (b) Bands from plants #4 and #10 were gel extracted and sequenced. Sequencing confirmed no deletions or insertions at the expected cleavage site. (c) Chromatograms show the absence of deletions at off-target sites in *GmSNAP14*. Red arrows indicate the expected cleavage site.

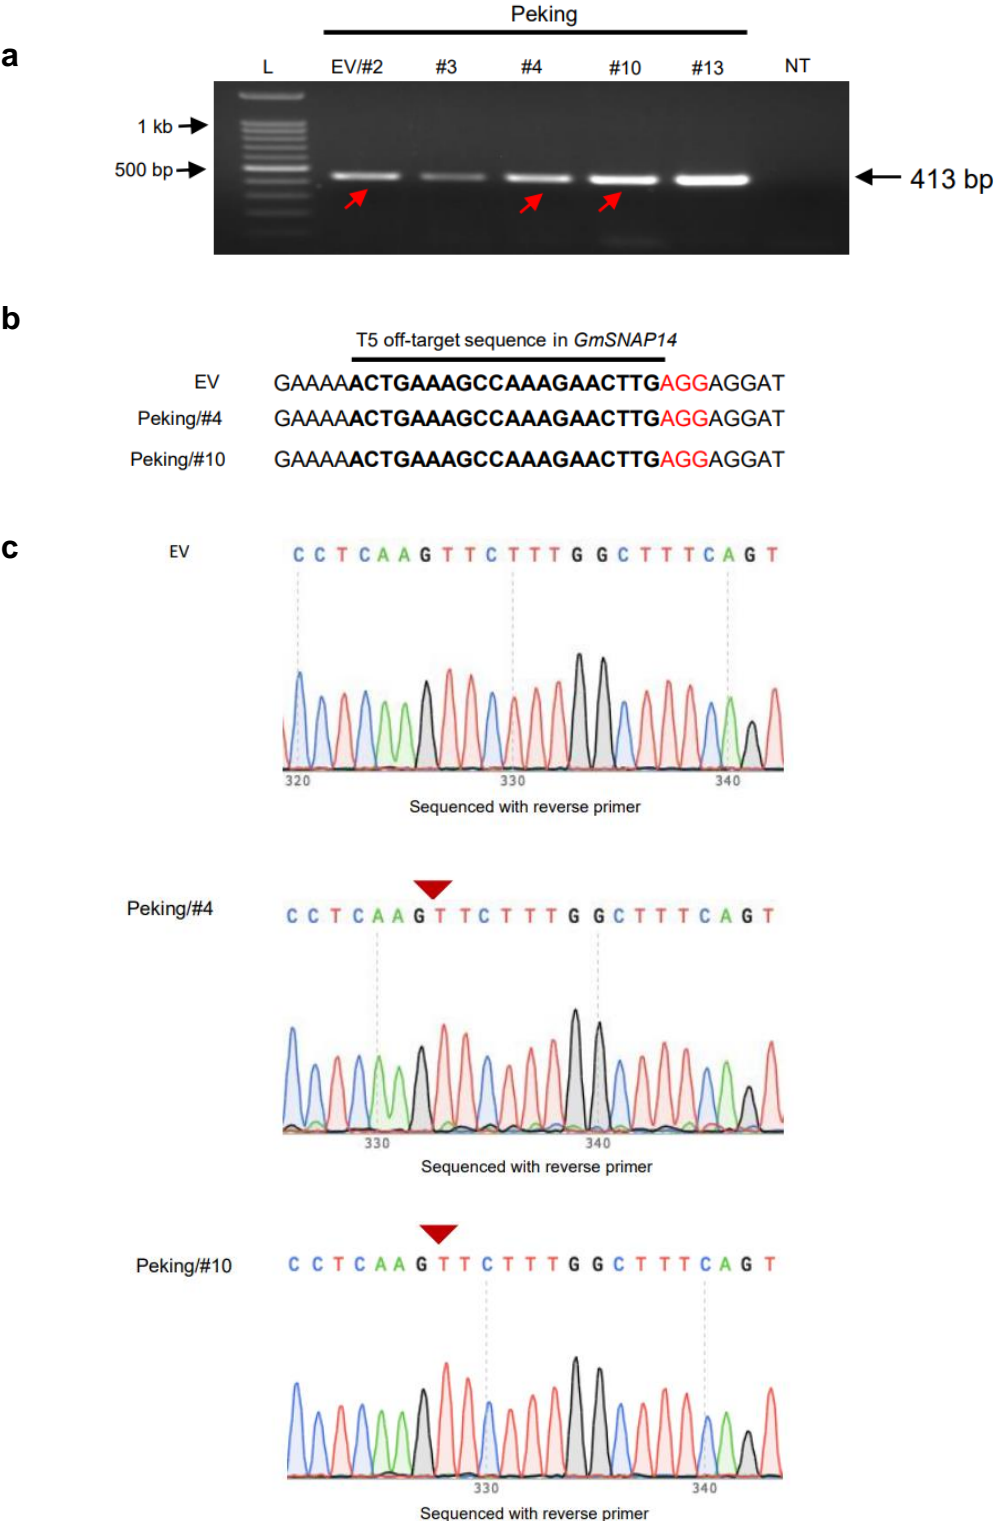

**ALLELIC COMBINATIONS  
SUPPLEMENTARY DATA**

**Supplementary Figure 23.** HG type and race test results at time of testing for four SCN populations: TN7 (HG type 2.5.7; Race 1), TN22 (HG type 1.2.5.7; Race 2), PA3 (HG type 7; Race 3), and MM4 (HG type 2.5.7; Race 5).

| Population  | Female Index       |         |        |         |         |          |          |         |          |         | HG Type | Race |
|-------------|--------------------|---------|--------|---------|---------|----------|----------|---------|----------|---------|---------|------|
|             | Female #<br>Lee 74 | Pickett | Peking | P188788 | P190763 | P1437654 | P1209332 | P189772 | P1548316 |         |         |      |
| <b>TN7</b>  | 235                | 8       | 1      | 90      | 0       | 0        | 99       | 0       | 68       | 2.5.7   | 1       |      |
| <b>TN22</b> | 279                | 66      | 16     | 80      | 0       | 0        | 97       | 0       | 70       | 1.2.5.7 | 2       |      |
| <b>PA3</b>  | 379                | 4       | 2      | 4       | 0       | 0        | 8        | 0       | 11       | 7       | 3       |      |
| <b>MM4</b>  | 246                | 16      | 2      | 49      | 0       | 0        | 79       | 0       | 58       | 2.5.7   | 5       |      |



# ALLELIC COMBINATIONS IN PI 90763 x Peking

**Supplementary Figure 24.** Violin plots showing lines with different combinations of homozygous resistance alleles derived from a population (a) PI 90763 x Peking; (b) SA10-8471 x PI 90763; and two populations reported by Basnet et al. 2022: (c) SA13-1385 x PI 90763, and (d) LD11-2170 x PI 90763. The numbers above each plot signify the number of tested lines (n), and letters indicate significant differences between plots based on the Tukey HSD test. The exact P values for each allele combination comparison are provided in the source data file.

**a**

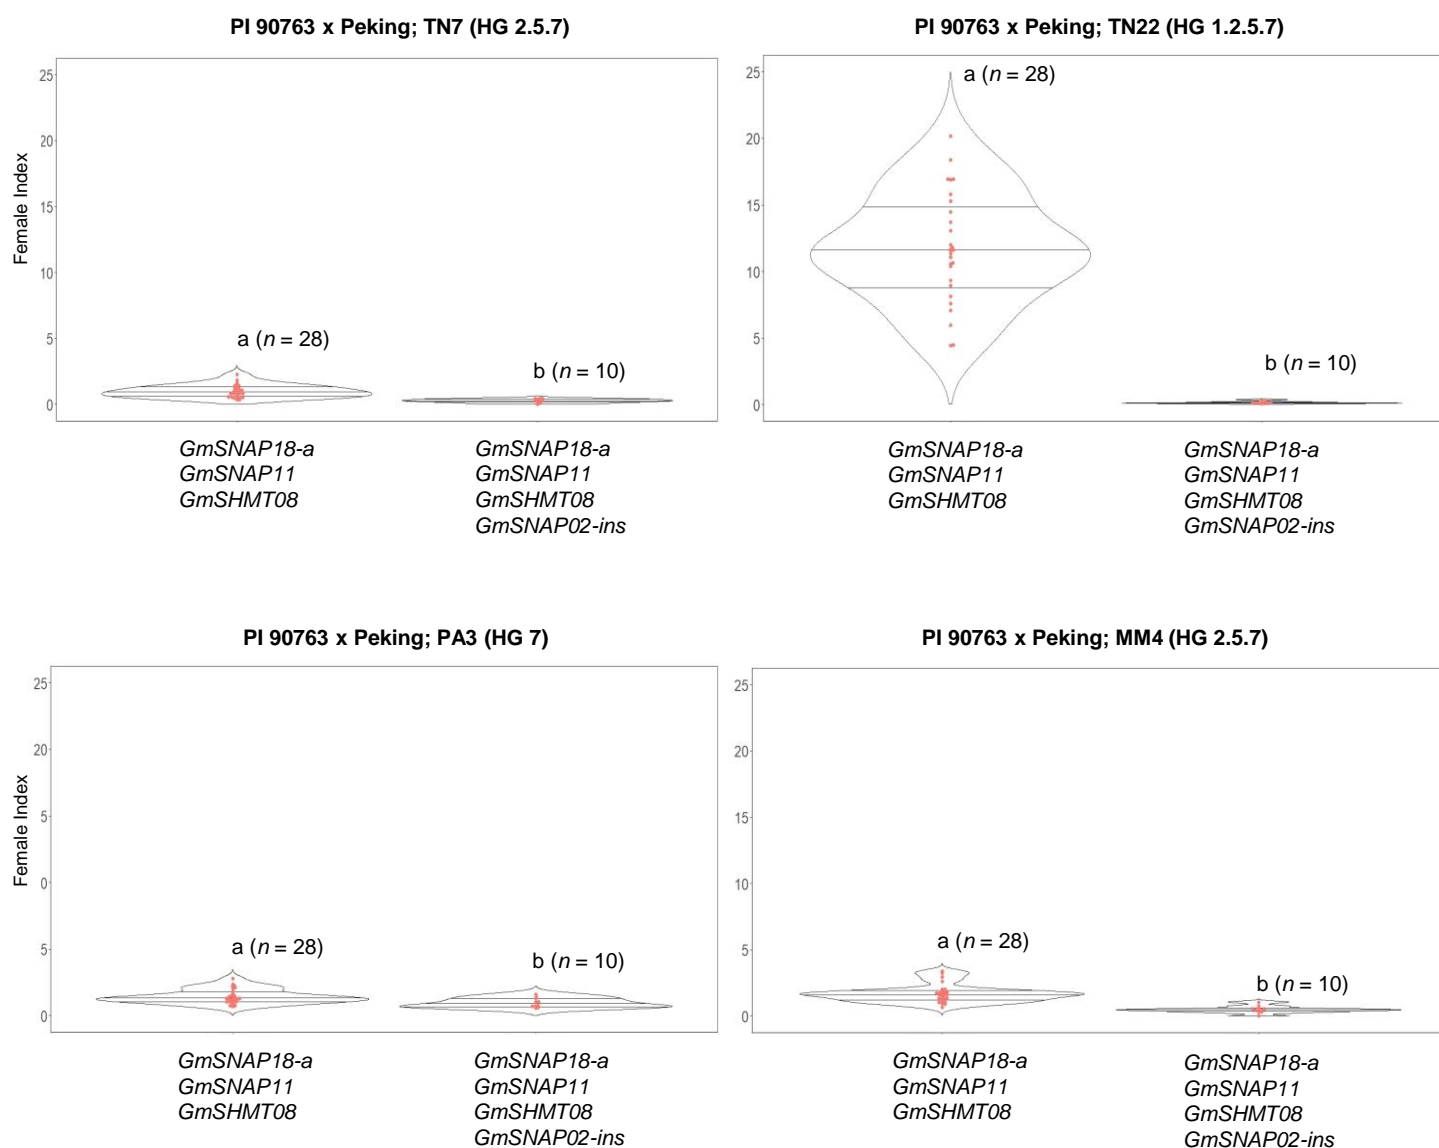

# ALLELIC COMBINATIONS IN SA10-8471 x PI 90763

**b**

SA10-8471 x PI 90763; TN7 (HG 2.5.7)

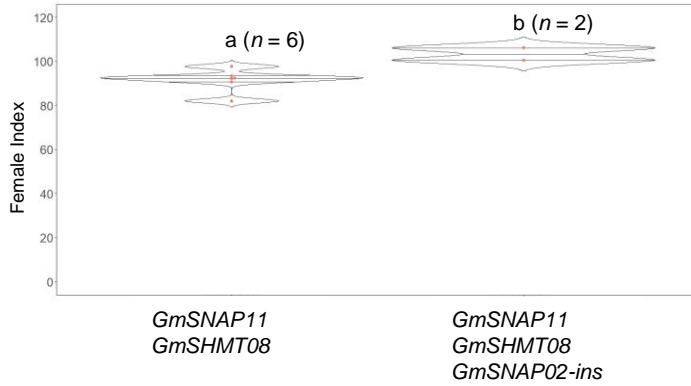

SA10-8471 x PI 90763; TN22 (HG 1.2.5.7)

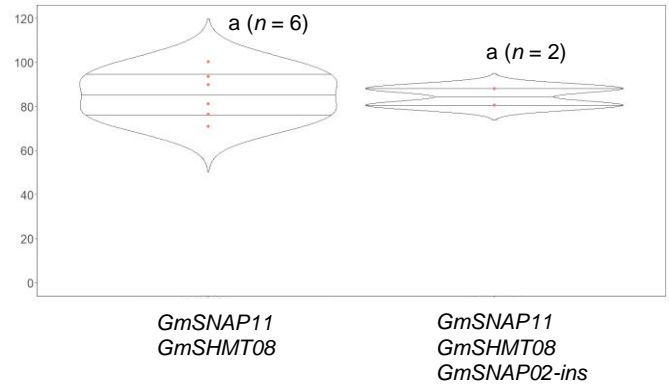

SA10-8471 x PI 90763; PA3 (HG 7)

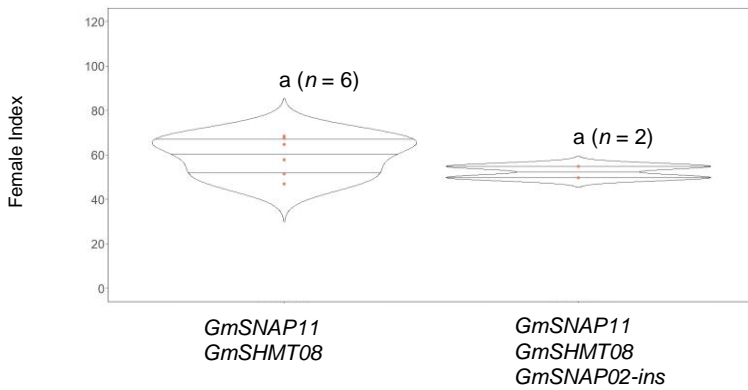

SA10-8471 x PI 90763; MM4 (HG 2.5.7)

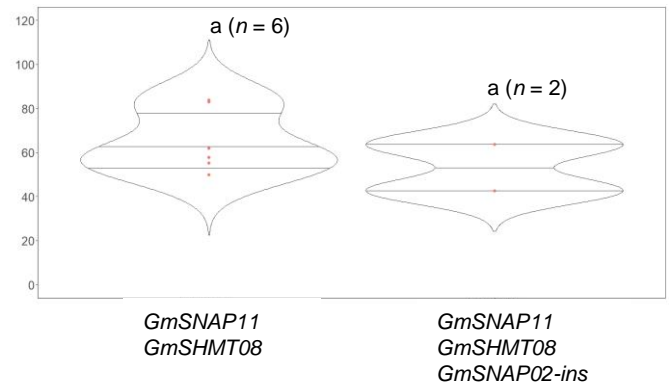

# ALLELIC COMBINATIONS IN SA13-1385 x PI 90763

C

SA13-1385 x PI 90763; TN7 (HG 2.5.7)

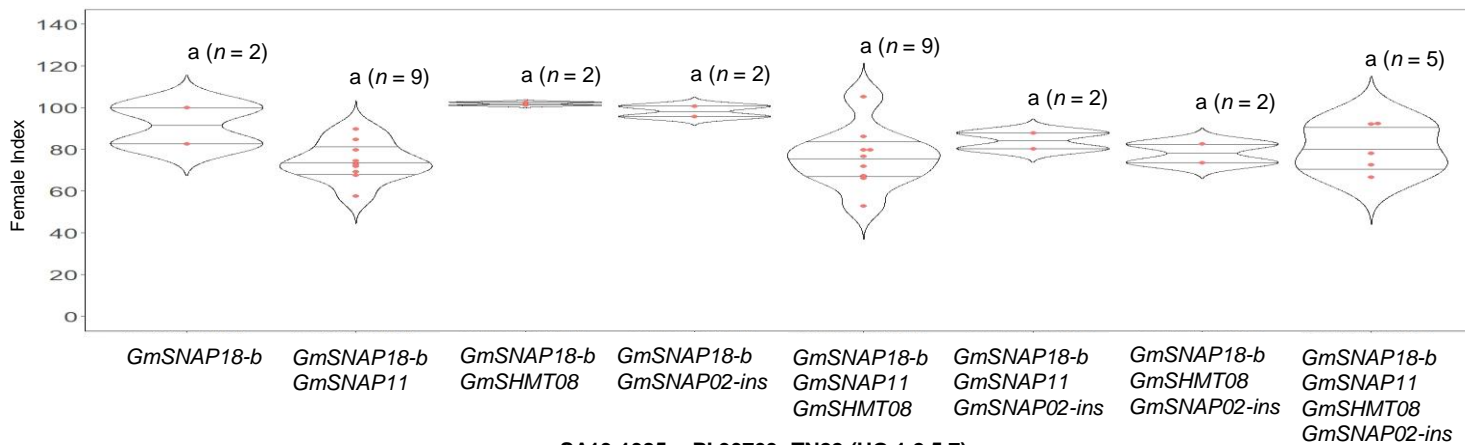

SA13-1385 x PI 90763; TN22 (HG 1.2.5.7)

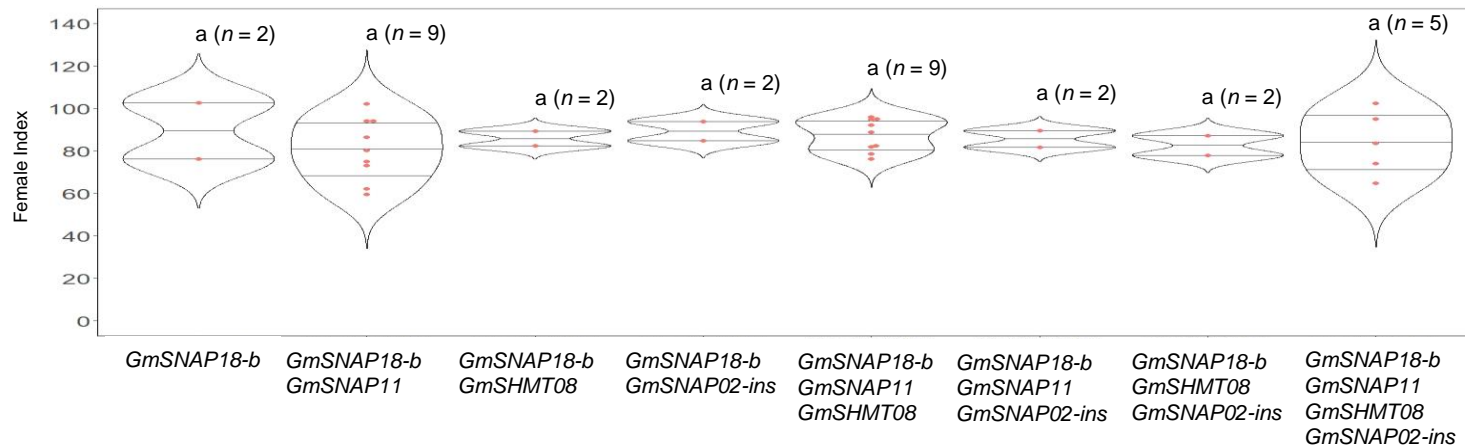

SA13-1385 x PI 90763; PA3 (HG 7)

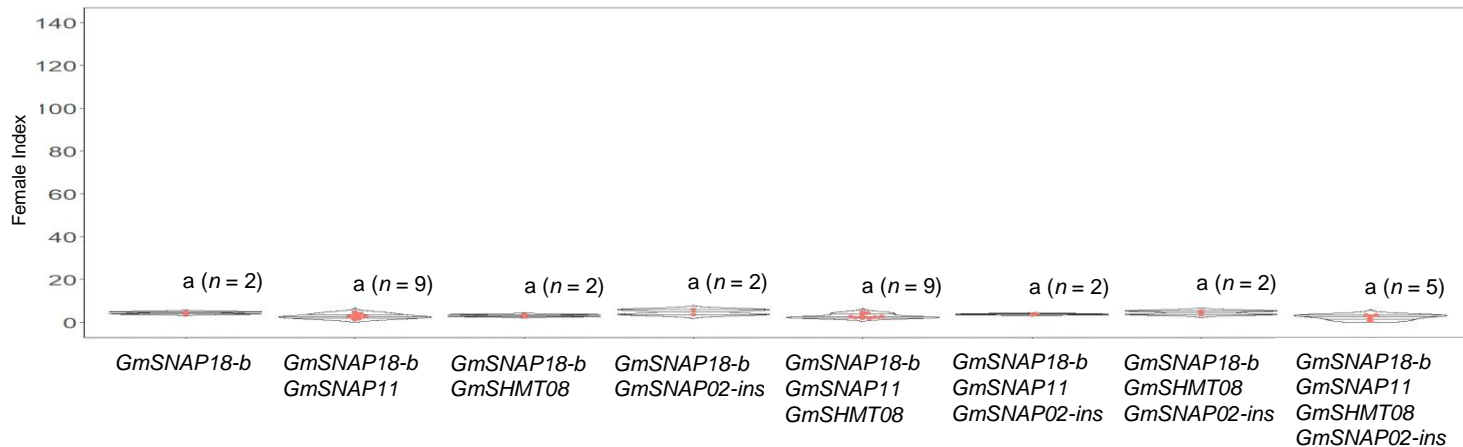

SA13-1385 x PI 90763; MM4 (HG 2.5.7)

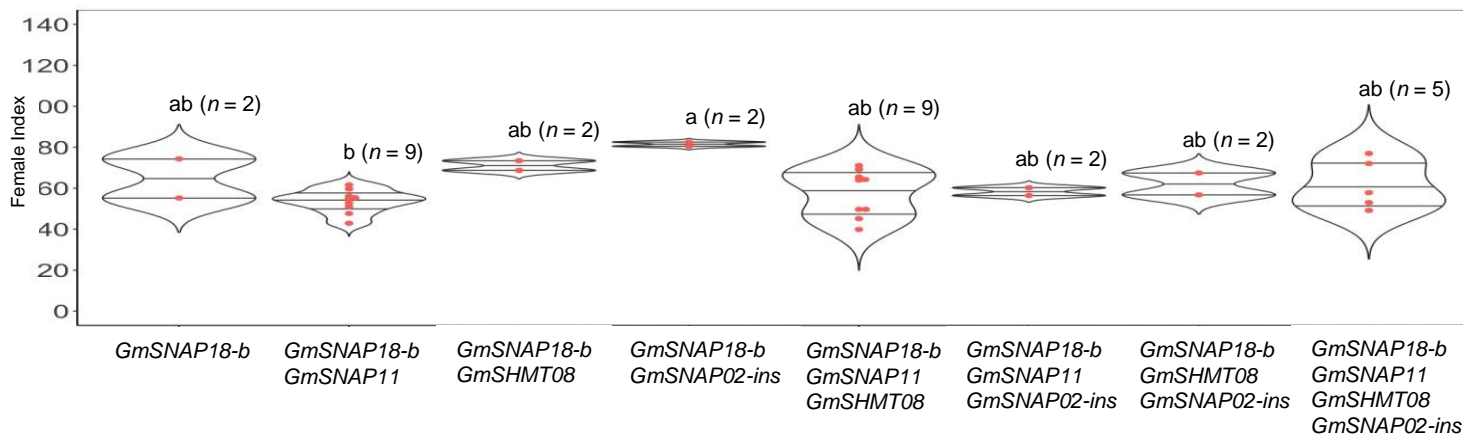

# ALLELIC COMBINATIONS IN LD11-2170 x PI 90763

**d**

LD11-2170 x PI 90763; TN7 (HG 2.5.7)

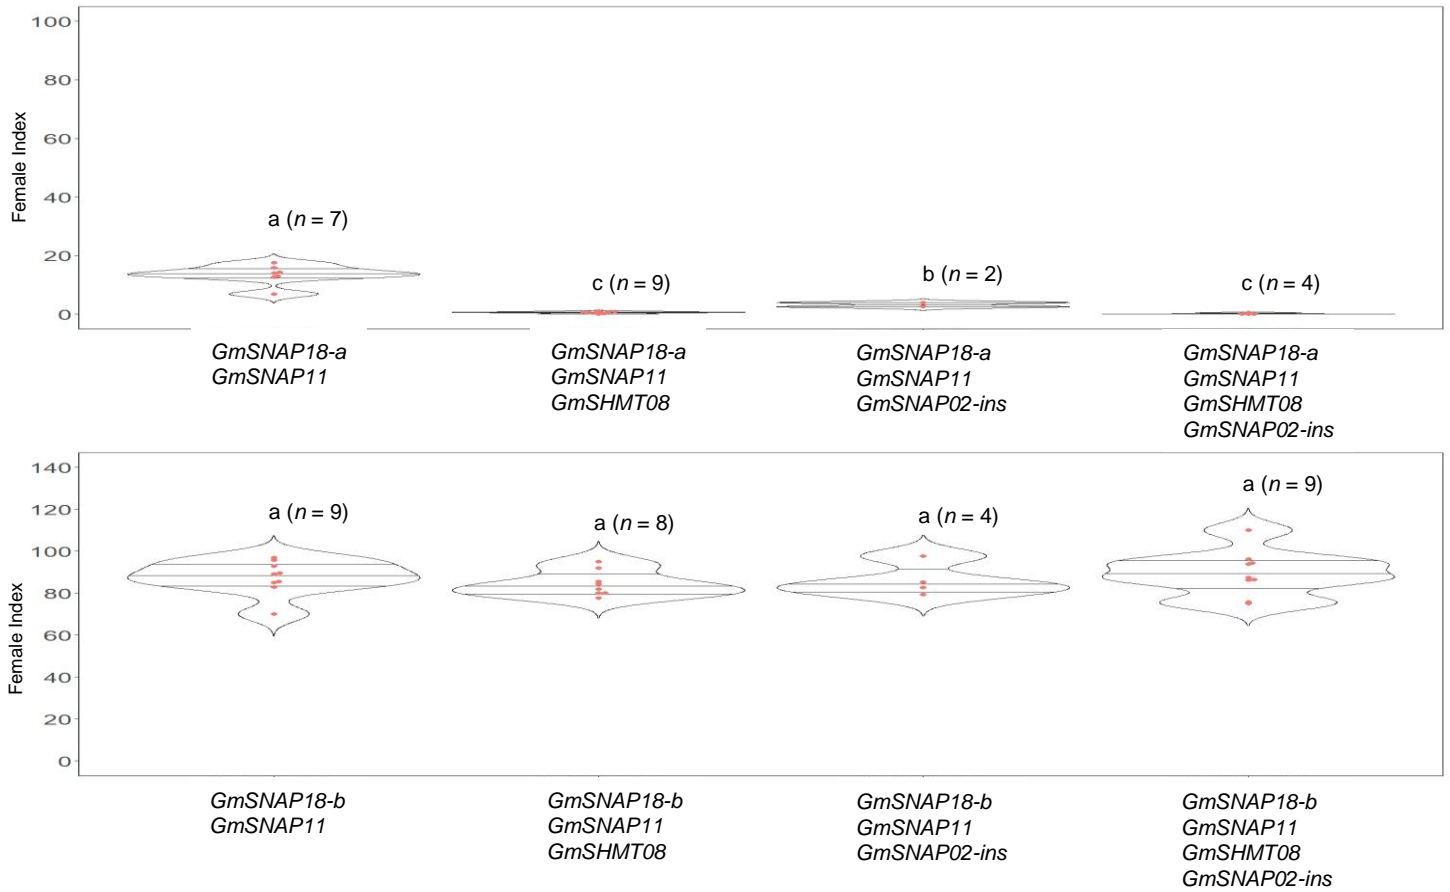

LD11-2170 x PI 90763; TN22 (HG 1.2.5.7)

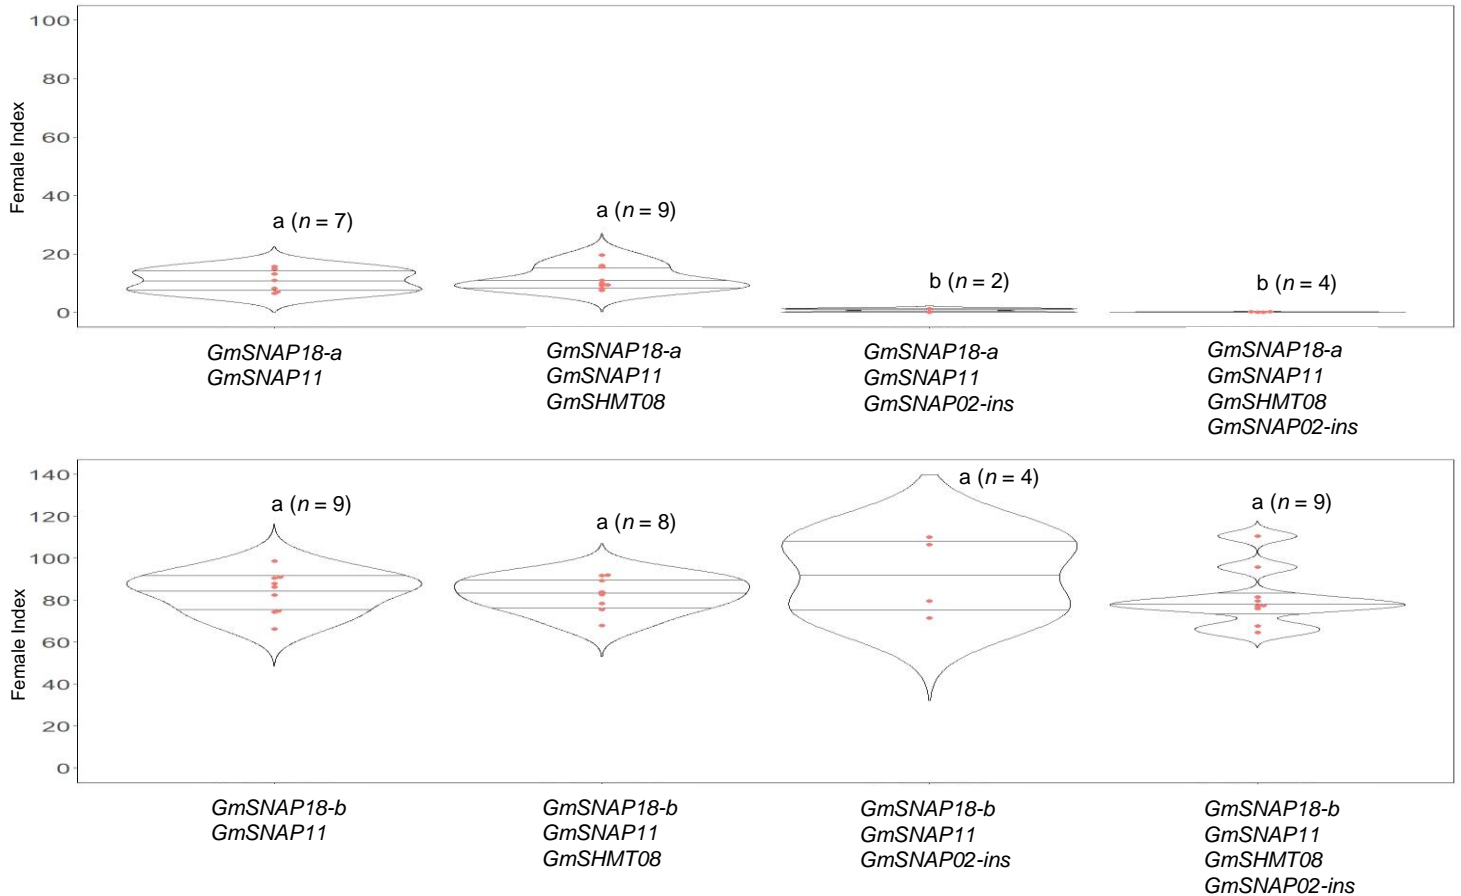

# ALLELIC COMBINATIONS IN LD11-2170 x PI 90763

LD11-2170 x PI 90763; PA3 (HG 7)

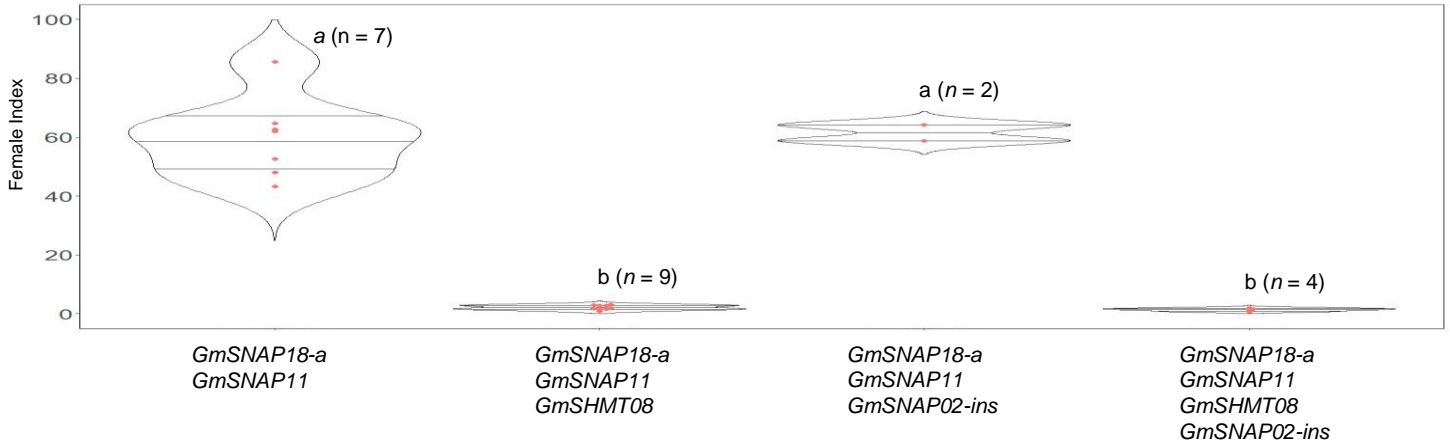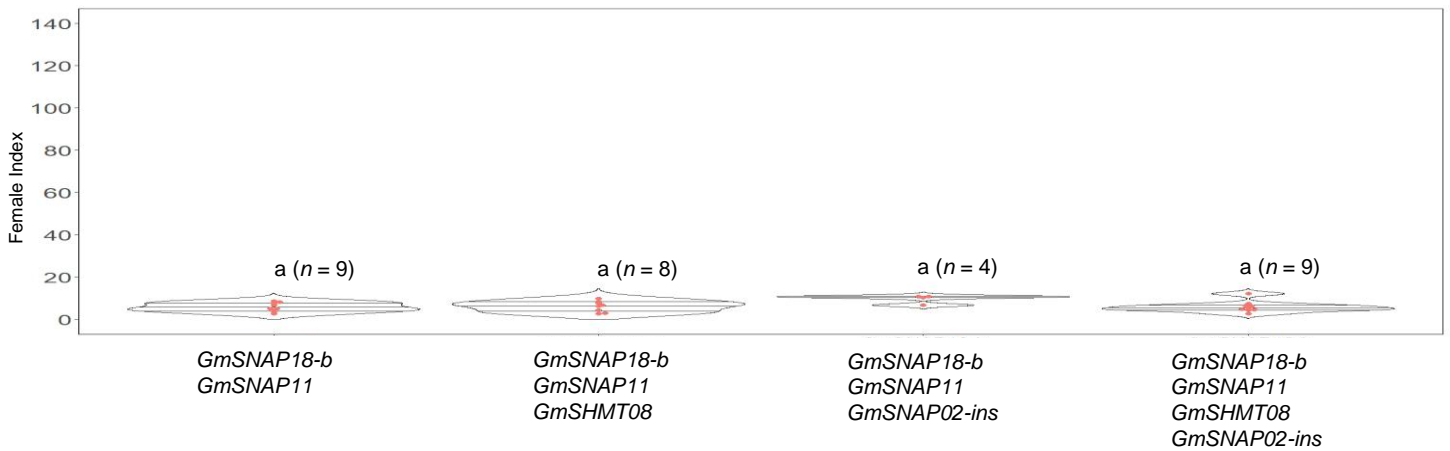

LD11-2170 x PI 90763; MM4 (HG 2.5.7)

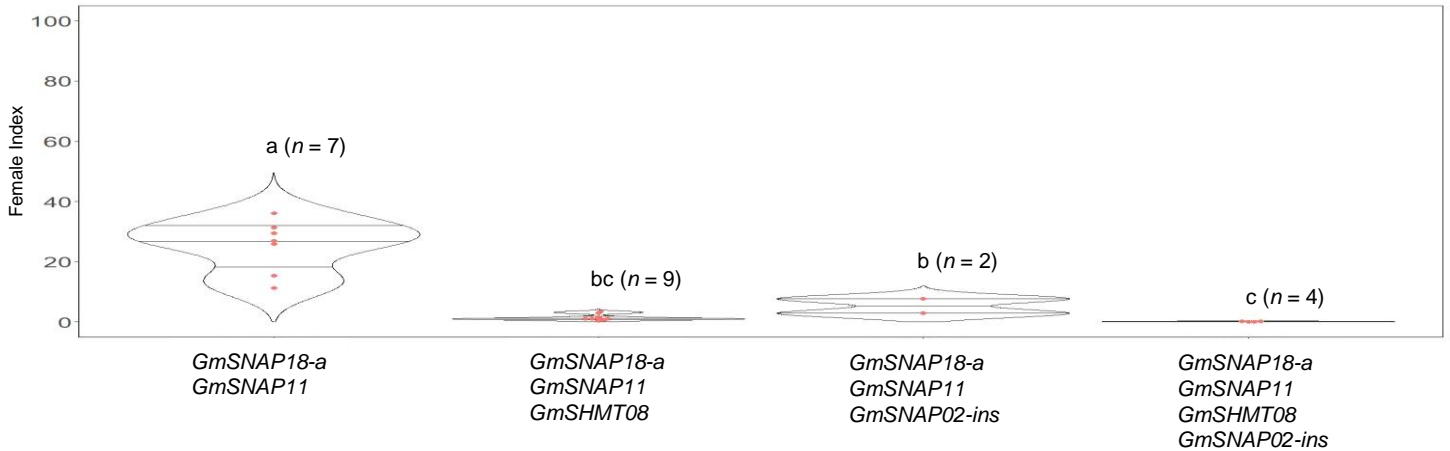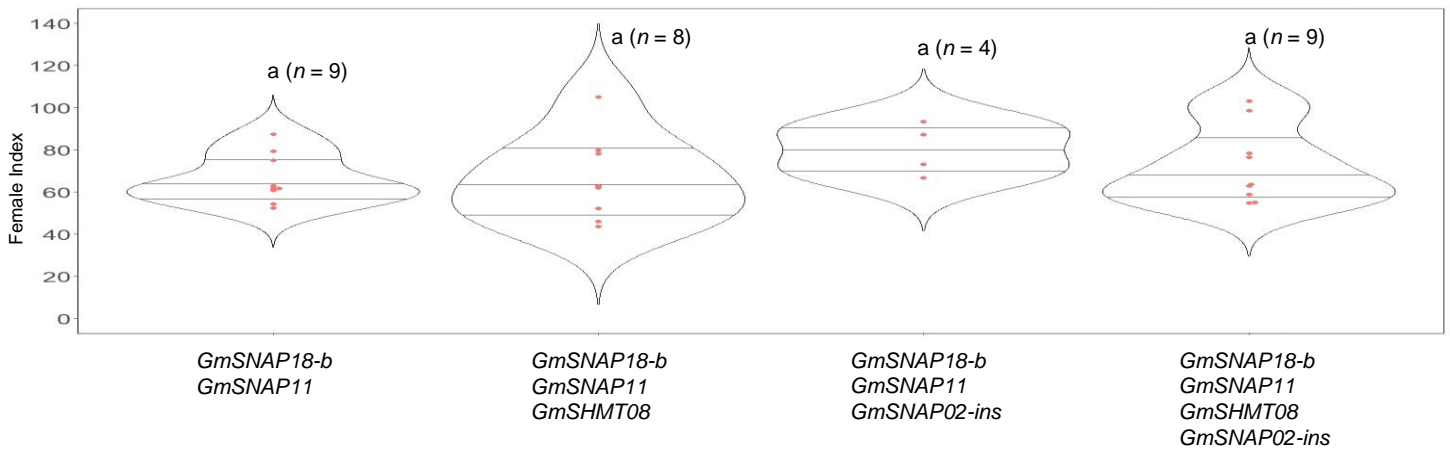

**DETECTION OF THE INSERTION  
IN *GmSNAP02*  
SUPPLEMENTARY DATA**

**Supplementary Figure 25.** (a) location of a large insertion in exon 8 of *GmSNAP02* resulting in the *GmSNAP02-ins* haplotype. Highlighted in red is unknown sequence of 6 kb; (b) sequences of primers and probes of TaqMan assays MU-SNAP02<sup>INS</sup>-WT and MU-SNAP02<sup>INS</sup>-MUT. (c) Endpoint genotyping assays MU-SNAP02<sup>INS</sup>-WT and MU-SNAP02<sup>INS</sup>-MUT for a detection of the *GmSNAP02-ins* allele. Scatter plot of fluorescence signals obtained from genomic DNA using SCN resistant checks. Non-amplified samples are indicated in gray.

**a**

```

Wm82      TCTGGCAGTATGTTTCTAGTTTTGGACATTTCAATAACTGTCTCCTCTGTTATAATGTTC      1920
PI90763   TCTGGCAGTATGTTTCTAGTTTTGGACATTTCAATAACTGTCTCCTCTGTTATAATGTTC      1920
*****

Wm82      TTATTAATGTTTGGTTTTATGATAAATTTATCTTGCATGACTGATTTCATTGCTCATT      1980
PI90763   TTATTAATGTTTGGTTTTATGATAAATTTATCTTGCATGACTGATTTCATTGCTCATT      1980
*****

Wm82      TATTTCTGAAGTACTGATGATTTTAAAAAATGGGCAGGATATTGCTGCTGCAATTGATG      2040
PI90763   TATTTCTGAAGTACTGATGATTTTAAAAAATGGGCAGGATATTGCTGCTGCAATTGATG      2040
*****

Wm82      AGGAAGATGTTGAAAGTTTACTGAAGT-----TAT      2068
PI90763   AGGAAGATGTTGAAAGTTTACTGAAGTCACTACTAGAAAAAGGCTTTTACGACGGTT      2100
*****

Wm82      -----TAT      2071
PI90763   AATAAGCATAACAACCGATGTAGATAGGGTGTCTGTAATAAGCTATTTTGTAGTAGTAT      2160
*****

Wm82      CAAGGAATTTGATAGTTTGACTCCTTTGGTAAGCTTCAAATGTTGTAAAATGAAACAGT      2131
PI90763   CAAGGAATTTGATAGTTTGACTCCTTTGGTAAGCTTCAAATGTTGTAAAATGAAACAGT      2220
*****

Wm82      TTTTAGTTGACGCAATGGAGTAAGACTTTATTGTTCTTGATATATAACAAGACTTTTTTC      2191
PI90763   TTTTAGTTGACGCAATGGAGTAAGACTTTATTGTTCTTGATATATAACAAGACTTTTTTC      2280
*****

Wm82      AATTTTATTTTTTGCATACCATAAATAGCTTTGGTCGCGGTAATTAATCAACATTTTCAT      2251
PI90763   AATTTTATTTTTTGCATACCATAAATAGCTTTGGTCGCGGTAATTAATCAACATTTTCAT      2340
*****

```

**b**

| ASSAY                         | Wm82 | PEKING | PI 90763 | HET | Primer-Forward          | Primer-Reverse          | Probe 1 - VIC-MGB Dye     | Probe 2 - FAM-MGB Dye     |
|-------------------------------|------|--------|----------|-----|-------------------------|-------------------------|---------------------------|---------------------------|
| MU-SNAP02 <sup>INS</sup> -WT  | YES  | YES    | NO       | YES | TGATGAGGAAGATGTTGAAAGT  | TCTTACTCCATTGCGTCAACTAA | AGTTTGACTCCTTTGGTAAGCTTCA | AGTTTGACTCCTTTGGTAAGCTTCA |
| MU-SNAP02 <sup>INS</sup> -MUT | NO   | NO     | YES      | YES | CCGATGTAGATAGGGTGTCTGTA | GTCTTACTCCATTGCGTCAACTA | AGTTTGACTCCTTTGGTAAGCTTCA | AGTTTGACTCCTTTGGTAAGCTTCA |

MU-SNAP02<sup>INS</sup>-MUT TaqMan assay detects *GmSNAP02-ins* allele in PI 90763. YES/NO relates to presence/absence of amplification.

**c**

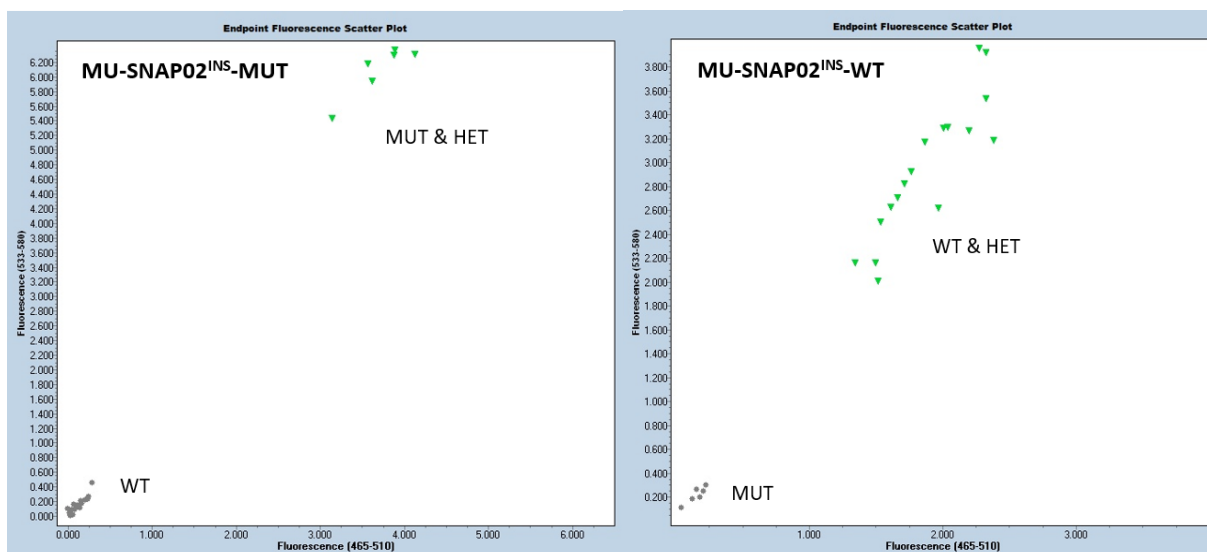

**Supplementary Figure 26.** (a) Sequences of primers and probes of TaqMan assays MU-SNAP02<sup>DEL-1</sup> and MU-SNAP02<sup>DEL-2</sup>. (b) Endpoint genotyping assays MU-SNAP02<sup>DEL-1</sup> and MU-SNAP02<sup>DEL-2</sup> for a detection of the *GmSNAP02-del* haplotype. Scatter plot of fluorescence signals obtained from genomic DNA using SCN resistant checks. Non-amplified samples are indicated in gray.

**a**

| ASSAY                      | Wm82     | Forrest  | PI 437654 | HET          | Primer-Forward                  | Primer-Reverse      | Probe 1 - VIC-MGB Dye | Probe 2 - FAM-MGB Dye |
|----------------------------|----------|----------|-----------|--------------|---------------------------------|---------------------|-----------------------|-----------------------|
| MU-SNAP02 <sup>DEL-1</sup> | NEG      | Allele X | Allele Y  | Both alleles | GATTATTTTCATTCATTCCAATATGGGCGAT | CAAGCCCCAACTGCTGAGT | CTGCCTGGCCAAAT        | AATCCTCGGCCCTC        |
| MU-SNAP02 <sup>DEL-2</sup> | Allele X | NEG      | Allele Y  | Both alleles | GATTATTTTCATTCATTCCAATATGGGCGAT | CAAGCCCCAACTGCTGAGT | CTGCCTGGCCAAAT        | AATCCTCGGCCCTG        |

MU-SNAP02<sup>DEL-1</sup> and MU-SNAP02<sup>DEL-2</sup> TaqMan assays detect the *GmSNAP02-del* allele in PI 437654. DEL: no amplification.

**b**

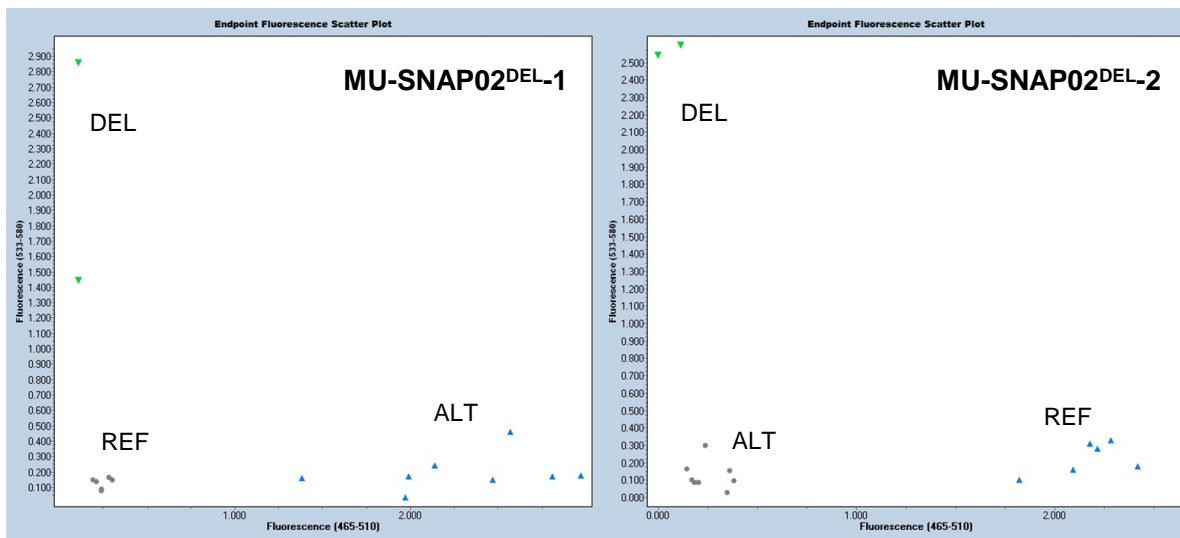



**Supplementary Figure 27.** Genotypes of selected SCN lines using TaqMan assays for detection of insertion and frameshift of *GmSNAP02*.

|             | <i>GmSNAP18-b</i> | <i>GmSNAP18-a</i> | <i>GmSNAP11</i> | <i>GmSHMT08</i> | <i>GmSNAP02-ins</i> | <i>GmSNAP02-del</i> |
|-------------|-------------------|-------------------|-----------------|-----------------|---------------------|---------------------|
| Williams 82 | .                 | .                 | .               | .               | .                   | .                   |
| Lee 74      | .                 | .                 | .               | .               | .                   | .                   |
| PI 88788    | YES               | .                 | YES             | .               | .                   | .                   |
| Cloud       | YES               | .                 | YES             | .               | .                   | .                   |
| PI 209332   | YES               | .                 | .               | .               | .                   | .                   |
| Pickett     | .                 | YES               | YES             | YES             | .                   | .                   |
| Peking      | .                 | YES               | YES             | YES             | .                   | .                   |
| PI 567305   | .                 | YES               | YES             | .               | .                   | .                   |
| PI 567516C  | .                 | YES               | YES             | .               | .                   | .                   |
| PI 90763    | .                 | YES               | YES             | YES             | YES                 | .                   |
| PI 507471   | YES               | .                 | YES             | .               | YES                 | .                   |
| PI 603445B  | .                 | YES               | YES             | YES             | YES                 | .                   |
| PI 437654   | .                 | YES               | YES             | YES             | .                   | YES                 |
| PI 89772    | .                 | YES               | YES             | YES             | .                   | YES                 |
| PI 567336A  | .                 | YES               | YES             | .               | .                   | YES                 |
| S05-11482   | .                 | YES               | YES             | .               | .                   | YES                 |
| Hartwig     | .                 | YES               | YES             | YES             | .                   | YES                 |

*GmSNAP18-a* and *GmSNAP18-b*: *rhg1-a* and *rhg1-b* alleles detected using Rhg1-2 and SNAP18-1 KASP assays (Kadam et al. 2016; Usovsky et al. 2021).

*GmSNAP11*: *rhg2* resistant allele detected using SNAP11-1 KASP assay (Usovsky et al. 2021).

*GmSHMT08*: *Rhg4* resistant allele detected using Rhg4-5 KASP assay (Kadam et al. 2016).

*GmSNAP02-ins*: resistant allele caused by large insertion in exon 8 of *GmSNAP02* in PI 90763 detected by MU-SNAP02<sup>INS</sup>-MUT TaqMan assay.

*GmSNAP02-del*: resistant allele caused by 22-nt deletion in exon 1 of *GmSNAP02* in PI 437654 detected by MU-SNAP02<sup>DEL</sup>-1 and MU-SNAP02<sup>DEL</sup>-2 TaqMan assays.
